# Supplementary material for: Measurement Report: Enhanced contribution of photooxidation to dicarboxylic acids in urban aerosols during the COVID-19 lockdown in Jinan, East China
Source: Copernicus journal article supplement (doi:10.5194/acp-2022-830), 2023-01-18
Supplement: Supplementary file [file acp-2022-830-RC1-supplement.pdf]

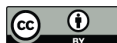

## Measurement Report: Enhanced contribution of photooxidation to dicarboxylic acids in urban aerosols during the COVID-19 lockdown in Jinan, East China

Jingjing Meng<sup>1,2</sup>, Yachen Wang<sup>1</sup>, Yuanyuan Li<sup>1</sup>, Tonglin Huang<sup>1</sup>, Zhifei Wang<sup>3</sup>, Yiqiu, Wang<sup>4</sup>, Min Chen<sup>1</sup>, Zhanfang Hou<sup>1</sup>, Kimitaka Kawamura<sup>5</sup>, Pingqing Fu<sup>2</sup>

<sup>1</sup>School of Geography and Environment, Liaocheng University, Liaocheng 252000, China

<sup>2</sup>Institute of Surface-Earth System Science, School of Earth System Science, Tianjin University, Tianjin 300072, China

<sup>3</sup>Jinan Environmental Monitoring Center of Shandong Province, Jinan 250101, China

<sup>4</sup>Liaocheng Environmental Information and Monitoring Center, Liaocheng, 252000, China

<sup>5</sup>Chubu Institute for Advanced Studies, Chubu University, Kasugai 487-8501, Japan

Correspondence to: Pingqing Fu (fupingqing@tju.edu.cn)

**Abstract.** To curb the spread of a novel coronavirus pandemic (COVID-19), a preventive lockdown (LCD) policy was first implemented across China in early 2020, resulting in a substantial drop-off in anthropogenic pollutant emissions and thus the amelioration of air quality. Unexpectedly, several haze events driven by enhanced secondary organic aerosols (SOA) still took place in the eastern China during the LCD. To investigate the effect of LCD measures on the formation and evolutionary process of SOA, PM<sub>2.5</sub> samples were collected before and during the LCD in Jinan, East China. The samples were measured for dicarboxylic acids (diacids) and related compounds, water-soluble inorganic ions, carbonaceous species, as well as the stable carbon isotopic compositions ( $\delta^{13}\text{C}$ ) of major diacids. Our results show that despite the sharp decrease of primary pollutants (e.g., CO, SO<sub>2</sub>, NO<sub>2</sub>, and element carbon) during the LCD, the O<sub>3</sub> concentration, proportion of secondary inorganic aerosols, concentration levels, and relative abundance of diacid homologues in water-soluble organic compounds (WSOC) were still 2–4 times higher than those before the LCD. The ratios of oxalic acid (C<sub>2</sub>) to diacids (C<sub>2</sub>/diacids) and to total detected organic components were higher during the LCD than those before the LCD, suggesting the more aged organic aerosols during the LCD under the clearer sky conditions. The temporal changes, diurnal variations in major diacids, and their higher concentrations and contributions during the LCD than before the LCD are mainly due to the enhanced photochemical oxidation by the higher O<sub>3</sub> and the stronger solar radiation during the LCD. Interestingly, compound-specific stable carbon isotope ratios ( $\delta^{13}\text{C}$ ) of C<sub>2</sub> and other major diacids show higher values in the nighttime than the daytime before the LCD, which indicate a significant contribution of organic acids via aqueous phase oxidation at night. Source apportionments using the molecular characteristics of organic compounds and positive matrix factorization (PMF) model suggest that the aqueous oxidation (45.2%) and coal combustion (16.7%) were the major sources before the LCD but the photochemical oxidation lunched by the higher O<sub>3</sub> concentration (48.8%) and aqueous oxidation (17.7%) were the dominant source during the LCD. The increased  $\delta^{13}\text{C}$  values of oxalic acid and other major organic acids along with the high ratios of C<sub>2</sub>/Gly, C<sub>2</sub>/mGly, and C<sub>2</sub>/diacids before and during the LCD confirm an isotopic fractionation effect during the precursor oxidation processes. Furthermore, more positive  $\delta^{13}\text{C}$  values of diacids are observed in the daytime than the nighttime during the LCD, which suggest an enhanced photochemical oxidation in the urban atmosphere during this period.

35

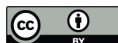

## 1 Introduction

Water-soluble organic compounds (WSOC), constituting a great proportion of atmospheric fine particles, have attracted a growing attention for the adverse effects on haze formation and global climate change (Lv et al., 2022; Wang et al., 2016). Dicarboxylic acids (diacids) and their organic precursors such as oxocarboxylic acids (oxoacids) and  $\alpha$ -dicarbonyls are ubiquitous in the atmosphere, accounting for 14% of WSOC in urban regions (Ho et al., 2007; Kawamura and Bikkina, 2016), and can be up to 52% in marine area (Bikkina et al., 2015). Due to the high solubility and hygroscopic property, diacid homologues can not only modify the hygroscopic growth of aerosols, but also improve the cloud condensation nuclei (CCN) activation and ice nuclei (IN) formation, thus they exert an important effect on radiative forcing of aerosols via scattering the solar radiation and cloud formation (Ding et al., 2021; Wang et al., 2015).

Diacids and related compounds can be emitted directly from biogenic activity (Rinaldi et al., 2011), vehicle exhausts (Kawamura and Kaplan, 1987), and combustions of biomass and fossil fuels (Cao et al., 2017; Narukawa et al., 1999), while their relative contribution to total aerosol mass is negligible (Shen et al., 2022; Wang et al., 2020a). A growing body of evidence from model studies, chamber experiments, cloud observations, and field measurements have highlighted that most of these water-soluble organic acids are predominantly generated from the photochemical oxidation of volatile organic compounds (VOCs) followed by partitioning into the aqueous phase in wet aerosols, fog, and cloud droplets (Carlton et al., 2007; Ervens et al., 2004, 2011; Fu et al., 2008; Lim et al., 2013; Shen et al., 2022; Wang et al., 2010). Therefore, diacid homologues have been regarded as essential indicators of SOA in the atmosphere to trace the aging processes and assess the oxidative capacity of aerosols (Enami et al., 2015; Zhao et al., 2020). As the lowest molecular weight and the most abundant diacid, oxalic acid ( $C_2$ ) has been proved to be mostly derived from two pathways: (1) photochemical breakdown (or decomposition) of longer-chain diacids ( $C_3$ – $C_{11}$ ) (Enami et al., 2015; Yu et al., 2021); and (2) secondary oxidation of VOCs via  $\alpha$ -dicarbonyls including glyoxal (Gly) and methylglyoxal (mGly) in aqueous phase of aerosol and cloud droplets, which has been considered to dominate over the first pathway (Carlton et al., 2007; Xu et al., 2022).

More oxidized SOA are largely produced from aqueous oxidation, while less oxidized SOA are largely derived from gaseous photochemical oxidation (Hu et al., 2017; Yu et al., 2019). Yu et al. (2019) reported that aqueous oxidation exerts a dominant effect on diacids and related compounds despite the increased contribution of photochemical oxidation in gas phase during the haze events in Beijing using multiple linear regression. A recent study by Xu et al. (2022) pointed out that a large portion of  $C_2$  was derived from the aqueous process of organic precursors emitted from fossil fuel combustion. Laboratory simulation has demonstrated that  $C_2$  can be photodegraded under the  $O_3$  chemical pathway (Gligorovski et al., 2010), but field measurements have demonstrated that  $O_3$ -dominated formation pathways are involved in the formation of  $C_2$  (Meng et al., 2021; Mochizuki et al., 2017). The formation mechanism and influencing factors as well of the contribution of aqueous oxidation and gaseous photochemical oxidation are still not well understood. Therefore, further investigations on  $C_2$  and related SOA are necessary to provide a knowledge base for improving air quality and the accuracy of model.

To curb the transmission of the novel coronavirus disease 2019 (COVID-19) in human society, a strict lockdown (LCD) measure was first implemented by the Chinese government starting at the end of January 2020 (Le et al., 2020). These dramatic restrictions resulted in a sharp drop-off of air pollutants (Li et al., 2021; Meng et al., 2021), for instance, the average concentrations of five parameters including  $CO$ ,  $NO_2$ ,  $SO_2$ ,  $PM_{2.5}$ , and  $PM_{10}$  decreased by 4.6–24.7% in 44 cities of China because of the travel restrictions during the LCD (Bao and Zhang, 2020). Unexpectedly, a few haze episodes still occurred in China during the LCD. Online observations, model simulations, and satellite measurements have pointed out that the appearance of haze events during the LCD were mainly caused by the unfavorable meteorological conditions, continuous emissions of  $SO_2$ ,  $NO_x$  and VOCs from power plants and petrochemical refineries, and an enhanced SOA formation (Huang et al., 2020; Li et al., 2020; Wang et al., 2020b; Shi et al., 2021; Zhong et al., 2021). These studies focused on the effect of the LCD policies on air quality and haze formation, for example, Le et al. (2020) and Huang et al. (2020) pointed out that the reduction of  $NO_x$  emissions lead to the enhanced ozone concentration, further improved the atmospheric oxidizing capacity



and promoted the formation of secondary aerosol during the LCD. However, little is known about the impact of LCD  
80 measures on the molecular distributions, aging processes, and the formation mechanisms of SOA from field observations.  
In order to understand the effect of the reduced anthropogenic emissions during the LCD and different meteorological  
parameters on the evolutionary process of homologous diacids and to investigate the relative contribution of aqueous  
oxidation versus photochemical oxidation to total diacid homologues, we collected fine aerosol samples in urban Jinan, East  
China on a day/night basis before and during the LCD. We compare the differences in the molecular distributions, stable  
85 carbon isotopic compositions, and formation processes of C<sub>2</sub> and the related SOA before and during the LCD. Then, we  
investigate the effect of meteorological parameter (e.g., RH, temperature, and solar radiation) and aerosol aqueous properties  
(e.g., liquid water content (LWC) and particle acidity (pH<sub>is</sub>)) on their formation processes in the urban atmosphere.

## 2 Experimental methods

### 2.1 Aerosol sampling

90 Fine aerosol (PM<sub>2.5</sub>) sampling was conducted on the rooftop of a six-story building (36.67° N, 117.06° E, approximately 20 m  
above ground) near the Jinan Environment Monitoring Center in the center of Jinan city, which is located in the midwestern  
part of Shandong Province, China (Fig. S1). The sampling site lies in a typical urban setting surrounded by heavy traffic  
roads, residential areas, and commercial centers. PM<sub>2.5</sub> samples were collected using prebaked (450 °C, 8 h) quartz fiber  
filters (8 in. × 10 in.) from 6 January to 17 February 2020. The government of Shandong Province first performed the  
95 preventive LCD starting on 24 January 2020; thus the whole sampling period was divided into two periods: (1) before the  
LCD from 6 to 23 January, (2) during the LCD from 31 January to 17 February. Each sample lasted for 12 h on a day/night  
basis using a high-volume air sampler (TISCH, USA) at an airflow rate of 1.013 m<sup>3</sup> min<sup>-1</sup>. The daytime samples were  
collected from 8:00 to 20:00, while nighttime samples were collected from 20:00 to 8:00 of the next day. Field blank  
samples were also collected by mounting the blank filter onto the sampler for 10 min without turning on the sampler before,  
100 during, and after the sampling campaign, respectively. A total of 72 PM<sub>2.5</sub> samples (36 for daytime and 36 for nighttime) and  
6 field blank samples were collected in the whole sampling period. After the collection, each filter was sealed in an  
aluminum foil bag and stored in a freezer (-20 °C) prior to analysis. The concentrations of PM<sub>2.5</sub>, PM<sub>10</sub>, CO, SO<sub>2</sub>, NO<sub>2</sub>, and  
O<sub>3</sub> as well as meteorological parameters such as wind direction/speed, RH, temperature, and solar radiation were retrieved  
from the website of <https://www.aqistudy.cn/>.

### 2.2 Chemical Analysis

#### 2.2.1 Determination of diacids and related compounds as well as levoglucosan

The quantitative method for analyzing diacids, oxoacids, and α-dicarbonyls in PM<sub>2.5</sub> has been described previously (Meng et  
al., 2020). Briefly, a quarter of the filter was extracted with 5 mL pure Milli-Q water under ultrasonication for three times.  
The water extracts were concentrated to near dryness and then reacted with 14% BF<sub>3</sub>/n-butanol at 100 °C for 1 hour to  
110 convert butyl esters or dibutoxy acetals. After derivatization, n-hexane was added and washed with pure water for three  
times. Finally, the hexane layer was determined by a gas chromatography-mass spectrometry (GC-MS) and  
quantificationally analyzed using a GC (Agilent 6980) coupled with an HP-5 column (0.2mm × 25m, 0.5 μm film thickness)  
and a flame ionization detector (FID). The same analytical method was also applied for field blank filters. Recoveries of the  
target compounds were 80% for C<sub>2</sub> and higher than 85% for other organic species.

115 Additionally, another portion of each filter sample was extracted with a mixture of dichloromethane and methanol (2:1, v/v)  
under ultrasonication. After being derivatized with 60 μL mixture of N, O-bis-(trimethylsilyl) trifluoroacetamide (BSTFA)  
and pyridine (5:1, v/v) at 70°C for 3 h, and the derivatized extracts were identified for levoglucosan using a GC-MS (Yi et al.,

How long was  
the storage  
period ?

Why 10 min?

What's the method? provide brief details about  
GC-MS operating parameters for the analysis.  
How these parameters were selected? Are the  
percent recoveries mentioned here good  
enough for such analysis? please reason.



2021). The recovery rate of levoglucosan is higher than 95%. Levoglucosan in the field blank samples is 4% less than the ambient samples. The data of targeted organic species presented in this study were corrected for both recoveries and field blanks.

### 2.2.2 Stable carbon isotopic composition of diacids and related compounds

The stable carbon isotopic compositions ( $\delta^{13}\text{C}$ ) of major diacids and related compounds were measured using the method reported elsewhere (Kawamura and Watanabe, 2004). Briefly, the  $\delta^{13}\text{C}$  values of the derivatized samples above were identified using a GC-isotope ratio MS (GC-IR-MS, Thermo Fisher, Delta V Advantage). Each sample was measured twice or three times to check the analytical error of the  $\delta^{13}\text{C}$  values, which were less than 0.2‰. The  $\delta^{13}\text{C}$  values were then calculated for free organic acids using an isotope mass balance equation based on the measured  $\delta^{13}\text{C}$  values of derivatives and the derivatizing agent ( $\text{BF}_3/n$ -butanol) (Kawamura and Watanabe, 2004).

### 2.2.3 Elemental carbon (EC), organic carbon (OC), and inorganic ions

Add WSOC also in the title

EC and OC in the  $\text{PM}_{2.5}$  samples were analyzed using a DRI Model 2015 Carbon Analyzer following the Interagency Monitoring of Protected Visual Environments (IMPROVE) thermal/optical reflectance (TOR) protocol (Chow et al., 2004). As for the measurement of inorganic ions and WSOC, an aliquot of each sample filter was extracted with 30 mL Milli-Q water using an ultrasonic bath for three times, and then filtered through PTFE filters to remove particles and filter debris. The water extract was then divided into two parts. One part was analyzed for inorganic ions using an ion chromatography (Dionex 600, USA), and the other part was used to determine WSOC using a Total Carbon Analyzer (TOC-L CPH, Shimadzu, Japan).

### 2.3 Calculation of aerosol liquid water content (ALWC) and particle in-situ pH ( $\text{pH}_{\text{is}}$ )

As for the calculation of aerosol liquid water content (ALWC) and particle in-situ pH ( $\text{pH}_{\text{is}}$ ), the ISORROPIA-II model that treated the  $\text{Na}^+$  -  $\text{NH}_4^+$  -  $\text{K}^+$  -  $\text{Ca}^{2+}$  -  $\text{Mg}^{2+}$  -  $\text{SO}_4^{2-}$  -  $\text{NO}_3^-$  -  $\text{Cl}^-$  system was applied. The forward mode with a metastable state in the ISORROPIA model was adopted (Fountoukis and Nenes, 2007).

## 3 Results and Discussion

### 3.1 Overview of observations

Temporal variations in the concentrations of  $\text{PM}_{2.5}$ ,  $\text{PM}_{10}$ , gaseous pollutants, major chemical components of  $\text{PM}_{2.5}$ , and meteorological parameters before and during the LCD are summarized in Table 1 and presented in Fig. 1. Both temperature and solar radiation exhibited a continuously increasing trend, whereas RH before the LCD was 1.4 times higher than that during the LCD. Wind speed ( $3.0 \pm 0.7 \text{ m s}^{-1}$ ) before the LCD was smaller than that ( $3.7 \pm 1.1 \text{ m s}^{-1}$ ) during the LCD (Table 1), suggesting that air pollution caused by emissions from the local and surrounding regions of Jinan city before the LCD was greater than that during the LCD, which was supported by the results of backward trajectory and PSCF analysis (Fig. S1)

The parameters of air quality including  $\text{PM}_{2.5}$ ,  $\text{PM}_{10}$ , CO,  $\text{SO}_2$ , and  $\text{NO}_2$  reduced by 39.3–62.4% during the LCD (Table 1, Fig. 1), suggesting that the air quality was better during the LCD because of the substantial reduction of anthropogenic emissions. As a significant indicator of atmospheric oxidizing capacity,  $\text{O}_3$  in Chinese megacities during the wintertime is primarily produced from the  $\text{NO}_x$ -saturated regime because of the lack of HOx radicals (Li et al., 2021). Being opposite to other five air-quality parameters,  $\text{O}_3$  concentration ( $66.3 \pm 21.0 \mu\text{g m}^{-3}$ ) during the LCD increased by 2.3 times compared to that ( $28.9 \pm 18.2 \mu\text{g m}^{-3}$ ) before the LCD (Table 1), indicating that the atmospheric oxidizing capacity during the LCD was

atm oxi capacity is not only a function of  $\text{O}_3$  concentration, authors need to substantiate the same more rigorously

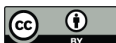

correct the spelling

155 significantly enhanced, which would facilitate the SOA formation through O<sub>3</sub>-dominated photochemical oxidation. The more  
favorable meteorological conditions including the higher temperature and the stronger solar radiation (Meng et al., 2021),  
and the remarkable decrease in PM<sub>2.5</sub> concentration during the LCD could facilitate more O<sub>3</sub> formation (Wu et al., 2020).  
Moreover, the significant reduction of NO<sub>2</sub> during the LCD could lead to the substantial drop of NO, and ultimately  
weakened the chemical loss of O<sub>3</sub> through NO titration (NO + O<sub>3</sub> = NO<sub>2</sub> + O<sub>2</sub>) (Wang et al., 2022). A recent study using the  
160 WRF-Chem model found that about 80% of the increased O<sub>3</sub> level in eastern China was mainly due to meteorological  
changes, and only 20% resulted from the reduced pollutant emissions (Wang et al., 2022). To quantitatively assess the  
relative contribution of meteorological factors versus emission reductions to the enhanced O<sub>3</sub> level during the LCD, random  
forest and multiple linear regression analysis were employed in this study. The results showed that in Jinan city only 18.2%  
of the enhanced O<sub>3</sub> concentration was resulted from the meteorological variations, and the other 81.8% was ascribed to the  
165 reductions of anthropogenic emissions (Fig. S1). Such a result is similar with that reported by Wang et al. (2022).  
The decreased concentrations of EC, OC, and WSOC in PM<sub>2.5</sub> but the enhanced ratios of OC/EC and WSOC/OC during the  
LCD (Table 1, Fig. 1) indicated more SOA productions due to the stronger atmospheric oxidizing capacity during the LCD  
(Zhong et al., 2021). As a key tracer for biomass burning, levoglucosan showed a positive relationship with OC, EC, and  
WSOC ( $R^2 \geq 0.45$ ) before the LCD rather than during the LCD ( $R^2 \leq 0.15$ ) (Table S1), suggesting that biomass burning  
170 played an important role on carbonaceous species before the LCD rather than during the LCD. Secondary inorganic ions  
(SIA, total concentration of SO<sub>4</sub><sup>2-</sup>, NO<sub>3</sub><sup>-</sup>, and NH<sub>4</sub><sup>+</sup>) were dominant components of PM<sub>2.5</sub>, which accounted for the higher  
percentages (46.9 ± 8.2%) in PM<sub>2.5</sub> mass during the LCD than that (39.9 ± 6.5%) before the LCD, indicating an enhanced  
formation of secondary aerosols during the LCD. The LWC concentration of aerosol is determined by RH and SIA  
concentration (Meng et al., 2020). In view of the higher RH and SIA concentration before the LCD, the LWC concentration  
175 (34.8 ± 32.7 μg m<sup>-3</sup>) before the LCD was 3.4 times higher than that (10.1 ± 10.0 μg m<sup>-3</sup>) during the LCD. However, pH<sub>is</sub>  
remained similar before (3.9 ± 0.3) and during the LCD (3.7 ± 1.0), indicating an insignificant difference in atmospheric  
aerosol acidity before and during the LCD.

### 3.2 Molecular distributions of diacids and related species

A homogeneous series of diacids (C<sub>2</sub>-C<sub>11</sub>), oxoacids, and α-dicarbonyls identified in PM<sub>2.5</sub> samples before and during the  
180 LCD are summarized in Table 2. To avoid the effect of atmospheric dilution due to the boundary layer height variations,  
here we use the ratios of SOA species to EC or CO to explore the secondary production of organic species (Yu et al., 2021).  
As shown in Fig. 2, the ratio of TDOCs normalized by CO (TDOCs/CO) increased exponentially with the enhancement of  
temperature before and during the LCD ( $R^2 > 0.5$ ), which agreed well with the Arrhenius Law, confirming that TDOCs in  
this study were primarily derived from secondary formation and the contribution of primary emissions was negligible.  
185 Additionally, the exponent number (0.067) of the regression trend line during the LCD was 3.5 times higher than that (0.019)  
before the LCD, indicating that the oxidation rate during the LCD was larger, largely due to the more favorable  
meteorological conditions. As showed in Table 2, the total concentration of detected organic components (TDOCs) exhibited  
an upward trend from 437 ± 117 μg m<sup>-3</sup> before the LCD to 486 ± 144 μg m<sup>-3</sup> during the LCD. The concentrations of diacids  
and oxoacids during the LCD increased by 1.1 and 2.1 times, respectively, while α-dicarbonyls during the LCD was almost  
190 the same to that before the LCD.  
The daytime concentration of diacids before the LCD was 17% lower than that at night, which was opposite to the diurnal  
variation of diacids concentration during the LCD (Fig. 3a). As the predominant species throughout the whole observation  
period, C<sub>2</sub> concentration increased from 181 ± 47.5 μg m<sup>-3</sup> before the LCD to 239 ± 108 μg m<sup>-3</sup> during the LCD (Table 2),  
despite of the significant decrease in the primary pollutants from anthropogenic emissions during the LCD. C<sub>2</sub> is an end  
195 product derived from photochemical decomposition of longer-chain diacids or secondary oxidation of α-dicarbonyls and  
oxoacids, thus the ratios of C<sub>2</sub>/diacids and C<sub>2</sub>/TDOCs can be considered essential tracers for aerosol aging (Wang et al., 2012;

Full form should be explained at the very first instance itself; line 182.

Is the difference statistically significant? given their large spread? please provide statistical significance for such instances throughout the manuscript

5

are these regression values statistically significant?



Zhao et al., 2020). Both ratios of  $C_2$ /diacids and  $C_2$ /TDOCs during the LCD were higher than those before the LCD (Fig. 3b), reflecting the more aged organic aerosols during the LCD. Therefore, the concentration of  $C_2$  as well as its relative abundance in total diacids and TDOCs were higher during the LCD than those before the LCD, mainly due to the accelerated formation of  $C_2$  during the LCD, which could offset the drop of organic precursors from anthropogenic emissions (Huang et al., 2020). Moreover, the daytime concentration of  $C_2$  and the ratios of  $C_2$ /TDOCs and  $C_2$ /diacids were lower than those at night before the LCD but an opposite trends were found during the LCD, being consistent with the diurnal changes of total diacids before and during the LCD (Fig. 3b). The second most abundant diacid was succinic acid ( $C_4$ ), followed by malonic acid ( $C_3$ ) and azelaic acid ( $C_9$ ) before the LCD, while the second dominant diacid during the LCD was  $C_3$ , followed by  $C_4$  and phthalic acid (Ph) (Table 2, Fig. 3a). These results suggested that these species had different sources and underwent different formation processes before and during the LCD. Both ratios of  $C_2$ / $C_4$  and  $C_3$ / $C_4$  have been used as indicators of photochemical aging of diacids, because the hydroxylation of  $C_4$  can be photodegraded into  $C_3$  through the decarboxylation process, and  $C_3$  can be photochemically oxidized into  $C_2$  via intermediates (e.g., ketomalonic ( $kC_3$ ) and hydroxymalonic acids) (Kawamura and Bikkina, 2016; Wang et al., 2010). Both  $C_2$ / $C_4$  ( $8.4 \pm 3.4$ ) and  $C_3$ / $C_4$  ( $1.6 \pm 0.4$ ) ratios during the LCD were higher than those ( $3.9 \pm 1.5$ ,  $0.3 \pm 0.1$ ) before the LCD (Fig. 3b), indicating the stronger photochemical transformation of organic aerosols during the LCD.

Azelaic acid ( $C_9$ ) is primarily derived from the secondary oxidation of unsaturated fatty acids (e.g., oleic acid) with a double bond at the C-9 position (Kawamura and Usukura, 1993), which is abundant in the fresh and aged aerosols emitted from biomass burning (Shen et al., 2022). It is noteworthy that  $C_9$  concentration ( $12.0 \pm 4.0$ ) before the LCD was 2.0 times higher than that ( $5.9 \pm 4.8$ ) during the LCD (Table 2), which was consistent with the variation of levoglucosan concentration (Table 1).  $C_9$  showed a more robust relationship with levoglucosan before the LCD ( $R^2 = 0.74$ ) than that ( $R^2 = 0.06$ ) during the LCD (Table S1), suggesting that biomass burning was an essential contributor to  $C_9$  before the LCD rather than during the LCD. Ph is primarily derived from the photochemical degradation of aromatic hydrocarbons (e.g., naphthalene) emitted from anthropogenic sources (Kawamura and Usukura, 1993). Although Ph was the most abundant diacid except for  $C_2$ - $C_4$  during the LCD, its concentration ( $8.8 \pm 11.0 \mu\text{g m}^{-3}$ ) and relative abundance ( $0.03 \pm 0.01$ ) during the LCD were lower than those ( $11.0 \pm 6.1 \mu\text{g m}^{-3}$ ,  $0.02 \pm 0.01$ ) before the LCD (Table 2, Fig. 3b), suggesting the remarkable drop of anthropogenic emissions during the LCD.

As the important intermediate compounds of mono-carboxylic acids, oxoacids can ultimately generate diacids through heterogeneous oxidation processes (Wang et al., 2012; Yu et al., 2021). The diurnal variations of oxoacids presented similar patterns with diacids in each period (Fig. 3a). Moreover, oxoacids correlated well with total diacids in each period, respectively ( $R^2 > 0.5$ , Fig. 2), indicating that oxoacids are the important intermediate species of diacids. The molecular distributions of oxoacids were characterized by the predominance of glyoxylic acid ( $\omega C_2$ ) and pyruvic acid (Pyr) in each period. Previous studies have demonstrated that  $C_2$  in urban aerosols is mainly generated from  $\omega C_2$  via aqueous oxidation (Cheng et al., 2015; Zhao et al., 2018). Therefore,  $C_2$  positively correlated with  $\omega C_2$  and  $\text{SO}_4^{2-}$  before and during the LCD ( $R^2 > 0.5$ , Fig. S2).

As the two smallest molecular weight  $\alpha$ -dicarbonyls in the aerosols, glyoxal (Gly) and methylglyoxal (mGly) are originated from the photochemical oxidation of volatile organic compounds such as aromatics, isoprene, and monoterpenes in the gaseous phase, which are then partitioned into the aqueous phase of aerosols, and ultimately are oxidized to relatively lower volatility organic acids (e.g.,  $\omega C_2$ , Pyr, and  $C_2$ ) (Carlton et al., 2007; Fu et al., 2008). Although the anthropogenic source emissions of  $\alpha$ -dicarbonyls decreased dramatically during the LCD, the higher temperature and stronger atmospheric oxidizing capacity during the LCD provided a favorable condition for  $\alpha$ -dicarbonyls productions via secondary oxidation, which could offset the drop of primary emissions. Therefore, the concentration ( $24.7 \pm 10.0 \mu\text{g m}^{-3}$ ) of  $\alpha$ -dicarbonyls during the LCD were about equal to that ( $25.1 \pm 13.5 \mu\text{g m}^{-3}$ ) before the LCD.

Howe about the same effect due to long range transport of aged airmass? how that could be ruled out?





### 3.3 Aqueous formation of SOA before the LCD

240 The nighttime concentrations of  $C_2$ , diacids, and TDOCs exhibited higher values than those during the daytime as discussed  
above. Such diurnal variations may be ascribed to the descended planetary boundary layer (PBL) height at night, which can  
cause the enhanced concentrations of  $C_2$  and related SOA. However, the increase in the ratios of  $C_2$ /diacids and  $C_2$ /TDOCs  
at night indicates that the lowered nighttime PBL height was not the case, which could be supported by the insignificant  
diurnal differences of primary pollutant markers such as  $Na^+$ ,  $Ca^{2+}$ , and  $Mg^{2+}$  ( $t$  test,  $p > 0.01$ ) between the daytime and  
245 nighttime. Considering the higher RH and LWC concentration at night, the increased concentrations of  $C_2$  and related SOA  
during the nighttime may be closely linked to the accelerated aqueous production (Cheng et al., 2015; Meng et al., 2020).  
The molecular pattern of TDOCs was predominated by  $C_2$  followed by  $C_4$  and  $C_3$  as discussed above, consistent with the  
molecular distribution in biomass burning smoke (Kawamura et al., 2013; Kundu et al., 2010; Meng et al., 2020; Sorathia et  
al., 2018). To explore the contribution of biomass burning to TDOCs, levoglucosan and  $K^+$  were proposed as reliable makers  
250 for biomass burning (Hoffmann et al., 2010; Huang et al., 2006).  $K^+$  is abundant in aerosols emitted from biomass burning  
(Andreae, 1983), thus  $K^+$  exhibited a close correlation with levoglucosan ( $R^2=0.77$ , Table S1) before the LCD. There was no  
obvious diurnal difference of levoglucosan and  $K^+$  between daytime ( $140 \pm 54.9 \text{ m}^{-3}$ ,  $2.0 \pm 0.1 \text{ } \mu\text{g m}^{-3}$ ) and nighttime ( $141 \pm$   
 $84.4 \text{ m}^{-3}$ ,  $2.1 \pm 0.4 \text{ } \mu\text{g m}^{-3}$ ), suggesting that the higher concentrations of  $C_2$  and related SOA at night were irrelevant to the  
difference in the emission strength of organic precursors from biomass burning in the daytime and nighttime.  $C_2$ , diacids,  
255 and TDOCs exhibited strong correlations with levoglucosan and  $K^+$  before the LCD ( $R^2 > 0.5$ ), while such correlations were  
not observed during the LCD ( $R^2 < 0.2$ ) (Table S1), suggesting that biomass burning was an essential contributor to  $C_2$  and  
related SOA before the LCD rather than during the LCD. Both ratios of  $C_2$ /levoglucosan ( $1.7 \pm 0.6$ ) and  $C_2/K^+$  ( $0.2 \pm 0.02$ ) at  
night before the LCD exhibited larger values than those ( $1.3 \pm 0.5$ ,  $0.16 \pm 0.02$ ) in the day, which was mainly ascribed to the  
accelerated aqueous formation of  $C_2$  at night. Moreover, the mean values of  $C_2$ /levoglucosan ( $1.5 \pm 0.6$ ),  $C_2/K^+$  ( $0.2 \pm 0.03$ ),  
260  $C_4$ /levoglucosan ( $0.4 \pm 0.1$ ), and  $C_4/K^+$  ( $0.05 \pm 0.02$ ) ratios before the LCD were higher than those ( $0.05$ ,  $0.05$ ,  $0.03$ ,  $0.03$ ) in  
fresh particles emitted from savanna fires of southern African (Gao et al., 2003). It is interesting to note that the average  
ratios of  $C_2/C_4$  ( $3.9 \pm 1.5$ ),  $C_3/C_4$  ( $0.3 \pm 0.1$ ), and  $C_2$ /diacids ( $0.52 \pm 0.55$ ) before the LCD were almost equal to those ( $3.8$ ,  
 $0.3$ , and  $0.55$ ) measured in the aerosols for two days aging biomass samples via chamber experiment (Shen et al., 2022),  
suggesting that  $C_2$  and related SOA before the LCD were linked tightly to the secondary oxidation of organic precursors  
265 emitted from biomass burning.

To explore the formation pathways and contributing factors of  $C_2$  and related SOA before the LCD, the temporal variations  
of major diacids, LWC,  $pH_{is}$ , and meteorological parameters (e.g., solar radiation, temperature, and RH) were illustrated in  
Fig. 4. **The correlation analysis between  $SO_4^{2-}$  and  $C_2$  can be used** to evaluate the aqueous formation process of  $C_2$  (Sorathia et  
al., 2018).  $C_2$  was correlated significantly with  $SO_4^{2-}$  in the daytime ( $R^2 = 0.53$ ) and nighttime ( $R^2 = 0.66$ ) (Fig. S2) before  
270 the LCD, confirming the dominant aqueous-phase formation pathway of  $C_2$ . It is worth noting that the slope of the regression  
line of  $C_2/SO_4^{2-}$  ratio ( $0.005$ ) at night was 1.3 times higher than that ( $0.004$ ) during the daytime (Fig. S2). Both the higher  
slope and  $C_2$  concentrations indicate a more efficient formation of  $C_2$  at night, largely because the  $C_2$  production requires  
multiple steps of aqueous oxidation from VOCs while the formation of  $SO_4^{2-}$  requires fewer steps (Miyazaki et al., 2009).  
Noticeably, the concentrations of  $C_2$  and diacids, as well as  $C_2$ /diacids ratio culminated on the nighttime of January 23,  
275 which was characterized by significantly higher LWC concentration ( $172 \text{ } \mu\text{g m}^{-3}$ ) and RH (86.9%) (Fig. 4). The conditions  
of higher LWC and RH are favorable for the partitioning of Gly and mGly from gaseous phase to aqueous phase (Carlton et  
al., 2006; Meng et al., 2021). Thus,  $C_2$  and its precursors (e.g., Gly and mGly) were positively correlated with RH and LWC,  
respectively ( $R^2 > 0.45$ , Fig. 5a). Moreover, the ratios of  $C_2$ /Gly and  $C_2$ /mGly also showed a significant correlation with RH  
and LWC ( $R^2 > 0.4$ , Fig. 5a). Such strong correlations suggest that the higher LWC concentration and RH could not only  
280 promote the formations of  $C_2$  and its precursors, but also facilitate the transformation of  $C_2$  from the organic precursors.

SO<sub>2</sub> to SO<sub>4</sub><sup>2-</sup> conversion could happen due to photochemistry in dry environment as well, why did authors assume that the entire SO<sub>4</sub><sup>2-</sup> is formed via aqueous chemistry only?



Therefore, LWC and RH can be regarded as vitally important factors controlling the aqueous production of  $C_2$ . The nighttime concentration of LWC and RH were higher than those during the daytime, which led to the higher concentration and percentage contribution of  $C_2$  in the nighttime. Previous studies have reported that  $C_2$  can also be derived from the chain-breaking of longer-chain diacids in the aqueous phase (Kawamura and Usukura, 1993; Miyazaki et al., 2009).  
285 However, there was moderate or no serious correlation between  $C_2$  and longer-chain diacids (e.g.,  $C_3$  and  $C_4$ ), respectively ( $R^2 < 0.3$ , Fig. 5a). Furthermore, longer-chain diacids and the ratios of  $C_2/C_3$  and  $C_2/C_4$  exhibited no significant correlation with LWC or RH ( $R^2 < 0.24$ , Fig. 5a). It can be concluded the effect of chain-breaking of longer homologous diacids on aqueous formation mechanism of  $C_2$  was negligible in this study. Numerous studies have reported that the acidic condition of aerosol is beneficial to the BSOA formation such as 2-methylglyceric acid from BVOCs (e.g., isoprene), and ultimately  
290 be transformed into  $C_2$  via Gly, mGly, and  $\omega C_2$  in the aqueous phase by acid-catalyzed oxidation reactions (Surratt et al., 2007). Laboratory experiment has pointed out that the acidic environment of aerosol can accelerate the uptake and production of Gly and mGly via acidic-catalyzed heterogeneous oxidation (Jang et al., 2002). Therefore,  $pH_s$  exhibited pronounced negative relationships with  $C_2$  and its precursors such as Gly and mGly ( $R^2 \geq 0.45$ , Fig. 3a). Therefore, we could conclude that  $C_2$  before the LCD was dominantly derived from the acidic-catalyzed aqueous oxidation with  $\alpha$ -dicarbonyls  
295 rather than longer-chain diacids determined by RH and LWC.

### 3.4 Enhanced $O_3$ -dominated formation of SOA during the LCD

As discussed in Section 3.2, the concentrations of  $C_2$ , diacids, and TDOCs as well as the ratio of  $C_2$ /diacids during the LCD were higher than those before the LCD, despite the anthropogenic source strength dropped dramatically during the LCD. Given the higher  $O_3$  concentration and stronger solar radiation during the LCD (Table 1), it can be expected that the  
300 enhanced concentration and contribution of  $C_2$  were driven by the promoted photochemical oxidation, which was supported by the significantly higher  $C_3/C_4$  ratio ( $1.6 \pm 0.4$ ) during the LCD than that ( $0.3 \pm 0.1$ ) before the LCD. Since  $C_3$  can be generated from photochemical oxidation of  $C_4$  in the atmosphere (Kawamura and Bikkina, 2016), the relatively high  $C_3/C_4$  ratio during the LCD (Fig. 3b) indicates that aerosols during the LCD experienced more substantial photochemical aging. Field measurements and chamber experiments have reported that  $C_2$  can be principally originated from photochemical  
305 oxidation of  $\alpha$ -dicarbonyls from VOCs driven by  $O_3$  and  $OH \cdot$  radicals (Meng et al., 2021; Mochizuki et al., 2017). Bikkina et al. (2021) reported a laboratory production of oxalic and other LMW diacids together with intermediate oxoacids and  $\alpha$ -dicarbonyls by ozonolysis of isoprene.  $O_3$  was considered as a major marker for oxidant concentration of photochemical oxidation because  $OH \cdot$  radical was unavailable in this study. In addition, solar radiation could also be used as a reliable proxy for photochemical productions of  $C_2$  and other diacids (Deshmukh et al., 2018). In view of the significant escalation of  
310  $O_3$  concentration and solar radiation during the LCD, it could be concluded that the productions of  $C_2$  and related compounds may be closely involved in the  $O_3$ -dominated photochemical pathways under the stronger solar radiation. To investigate the formation mechanism and potential sources of  $C_2$  and related SOA during the LCD, the temporal variations in  $C_2$  and its precursors,  $O_3$ , as well as meteorological factors are presented in Fig. 4. It is interesting to note that the highest  $O_3$  concentration was observed on the daytime of January 31 when the concentrations of  $C_2$  and diacids reached  
315 their peaks. Moreover, both  $C_2$  and diacids concentrations as well as the  $C_2$ /diacids ratio exhibited robust correlations with  $O_3$  ( $R^2 > 0.5$ , Fig. 5b), respectively, suggesting that  $O_3$  played an important role in the formation of  $C_2$  and other diacids. Additionally,  $C_2$  and diacids concentrations exhibited similar patterns of variations (Fig. 4) and strong correlations ( $R^2 > 0.5$ , Fig. 5b) with solar radiation during the daytime. However, such similarities and strong correlations of those were not observed with temperature ( $R^2 < 0.2$ , Fig. 4 and 5b), suggesting that the effect of temperature on the photochemical  
320 formation of  $C_2$  was negligible. The enhancement of temperature can promote the productions of  $C_2$  and its precursors (Meng et al., 2018), while the increase in the temperature can accelerate the volatilization of  $C_2$ , leading to the drop of  $C_2$





concentration in the aerosol phase (Bilde et al., 2015). These results confirm that C<sub>2</sub> and other diacids was overwhelmingly derived from the O<sub>3</sub>-dominated photochemical processes driven by the stronger solar radiation.

Numerous studies have demonstrated that the longer-chain diacids can be photochemically degraded into C<sub>2</sub> (Kawamura and Bikkina, 2016; Zhao et al., 2020). It is worth noting that C<sub>2</sub> was correlated strongly with longer-chain diacids such as C<sub>3</sub> and C<sub>4</sub>, respectively ( $R^2 > 0.5$ , Fig. 5b). The ratio of C<sub>2</sub>/diacids was correlated strongly with the ratios of C<sub>3</sub>/C<sub>4</sub> ( $R^2 = 0.68$ ) and C<sub>2</sub>/C<sub>4</sub> ( $R^2 = 0.58$ ) (Fig. 5b), indicating that C<sub>2</sub> may be largely derived from the photochemical degradation of higher molecular weight homologues of diacids. However, the correlation of the C<sub>2</sub>/diacids ratio with (C<sub>3</sub>-C<sub>11</sub>)-C/WSOC ( $R^2 = 0.12$ ) was weak, primarily because the supply rates of longer-chain diacids have been demonstrated to be faster than their degradation rates of forming C<sub>2</sub> (Zhao et al., 2020). C<sub>2</sub>/diacids was correlated robustly with solar radiation during the daytime ( $R^2 = 0.76$ , Fig. 5b). Previous study suggested that the correlation analysis of C<sub>2</sub>/diacids, C<sub>2</sub>/C<sub>4</sub>, and C<sub>3</sub>/C<sub>4</sub> with O<sub>3</sub> could indicate the photochemical chain-breaking of longer-chain diacids producing C<sub>2</sub> (Liu et al., 2021). These ratios were observed to be correlated with O<sub>3</sub> ( $R^2 > 0.45$ , Fig. 5b). These results confirm that C<sub>2</sub> during the LCD was primarily originated from the photochemical degradation of longer-chain homologous diacids that was driven by stronger solar radiation and higher O<sub>3</sub> concentration rather than higher temperature.

The photochemical oxidation of Gly and mGly has been proposed as a considerable regional and global source of C<sub>2</sub> (Carlton et al., 2007; Fu et al., 2008). Gly can be firstly oxidize to ωC<sub>2</sub> and subsequently to C<sub>2</sub>, while mGly can be oxidized to C<sub>2</sub> via Pyr (Wang et al., 2012; Warneck, 2003). The correlations of C<sub>2</sub> with Gly ( $R^2 = 0.51$ ) and ωC<sub>2</sub> ( $R^2 = 0.53$ ) were stronger than those with mGly ( $R^2 = 0.38$ ) and Pyr ( $R^2 = 0.004$ ). Carlton et al. (2007) have reported that the oxidation rate of Gly ( $3 \times 10^{10} \text{ M}^{-1} \text{ s}^{-1}$ ) with OH· radicals is faster than that of mGly ( $1.1 \times 10^9 \text{ M}^{-1} \text{ s}^{-1}$ ). Moreover, the C<sub>2</sub>/Gly ratio was correlated significantly with O<sub>3</sub> ( $R^2 = 0.49$ ), whereas C<sub>2</sub>/mGly ratio exhibited no correlation with O<sub>3</sub> ( $R^2 = 0.03$ ) (Fig. 5b). These results suggest that the photochemical oxidation of Gly via ωC<sub>2</sub> contributed more to the formation of C<sub>2</sub> than the oxidation of mGly via Pyr, in which O<sub>3</sub> was an important influencing factor.

### 3.5 Stable carbon isotopic compositions of diacids

#### 3.5.1 Differences in δ<sup>13</sup>C values before and during the LCD

δ<sup>13</sup>C of specific organic acids can provide insights into the photochemical aging (or processing) of organic aerosols due to isotopic fractionation of carbon during the phase partitioning and/or photochemical oxidation (Wang et al., 2020a; Zhang et al., 2016). On average, most of the detected diacid homologues exhibited higher δ<sup>13</sup>C values during the LCD than those before the LCD (Table 3, Fig. 6). A previous study demonstrated that the enhanced δ<sup>13</sup>C values in diacid homologues were found with UV irradiation time (Pavuluri and Kawamura, 2016). Additionally, Shen et al. (2022) reported that the δ<sup>13</sup>C value for C<sub>2</sub> in the 7-d aged biomass samples was higher than in the 2-d aged biomass samples using the combustion chamber. Thus, the enrichment of δ<sup>13</sup>C values in diacid homologues during the LCD was mainly due to the promoted photochemical oxidation driven by the higher O<sub>3</sub> and the stronger solar radiation during the LCD. Similar to the diurnal variations in major diacids' concentrations, the nighttime δ<sup>13</sup>C values of these detected diacids were more positive (or more negative) than those in the daytime before (or during) the LCD, which was ascribed to their different sources and formation processes in these two observation periods. In brief, the δ<sup>13</sup>C values exhibited a decreasing trend as the carbon numbers of diacids increased (Fig. 6), consistent with other observation campaigns elsewhere (Meng et al., 2020; Pavuluri and Kawamura, 2016; Wang and Kawamura, 2006). The mean δ<sup>13</sup>C value ( $-20.3 \pm 2.5\%$ ) of C<sub>2</sub> was the heaviest in each period (Table 3), which was comparable to that ( $-19.8 \pm 3.5\%$ ) observed in its surrounding city such as Liaocheng (Meng et al., 2020), and higher than the values obtained in other China's megacities such as Beijing ( $-22.9 \pm 3.4\%$ ) (Zhao et al., 2018) and Xi'an (PM<sub>2.5</sub>: from  $-21.1$  to  $-23.5\%$ ) (Wang et al., 2012), but smaller than the values measured in the Korea Climate Observatory at Gosan ( $-15.8 \pm 4.3\%$ ) of East Asia (Zhang et al., 2016) and western Pacific and Southern Ocean ( $-16.8 \pm 0.8\%$ ) (Wang and Kawamura, 2006) in the winter (Fig. 7). It is worth noting that the average δ<sup>13</sup>C value of C<sub>2</sub> ( $-22 \pm 1.9\%$ ) before the LCD



was equal to that ( $-21.9 \pm 1.2\%$ ) determined in the 2 d biomass samples (Shen et al., 2022) (Fig. 7), confirming that biomass  
365 burning and subsequent oxidation exerted an important effect on  $C_2$  before the LCD.

As mentioned above,  $C_2$  can be not only originated from the photochemical breakdown (or decomposition) of  $C_3$  and  $C_4$  via  
 $kC_3$  and hydroxymalonic acids ( $hC_4$ ), but also be derived from the photochemical oxidation of aromatic hydrocarbons via  
 $\omega C_2$ . The positive correlations of the  $^{13}C$  values of  $C_2$  with mass ratios of  $C_2/\omega C_2$  ( $R^2 \geq 0.39$ ) and  $C_2/kC_3$  ( $R^2 \geq 0.37$ ) during  
the LCD were observed, whereas such robust relations only with  $C_2/\omega C_2$  ( $R^2 \geq 0.47$ ) rather than  $C_2/kC_3$  ( $R^2 \geq 0.01$ ) before  
370 the LCD were observed (Fig. 8). These results imply that the effect of photochemical decomposition of higher diacid  
homologues on  $C_2$  before the LCD was minor, which was consistent with the discussions in Section 3.3. The isotopic values  
of diacids followed the order of  $C_2 > C_3 > C_4$  in each period (Fig. 6), primarily because diacids containing more carbon  
numbers may be more reactive to oxidants such as  $O_3$  and  $\cdot OH$  radicals in the atmosphere (Aggarwal and Kawamura, 2008).  
On the other hand, the removal of  $CO_2/CO$  in the processes of  $C_3$  and  $C_4$  reacting with atmospheric oxidants can generate  
375 more  $^{13}C$ -enriched  $C_2$  due to the KIEs (Wang and Kawamura, 2006). The isotopic values of  $C_9$  ranged from  $-25.2\%$  to  
 $-29.8\%$  before the LCD, whose difference was less distinguished than those of  $C_2$ - $C_4$  (Table 3). It is worth noting that the  
 $\delta^{13}C$  values of organic species from marine plankton ( $-20\%$ ) are higher than those from terrestrial higher plants ( $C_3$  plants:  
 $-27\%$ ). The  $\delta^{13}C$  values of  $C_9$  and the strong correlation of  $C_9$  with levoglucosan before the LCD as discussed above  
indicate that biomass burning emitting unsaturated fatty acids and subsequent aqueous oxidation was an important  
380 contributor to  $C_9$  in Jinan during the wintertime. The most negative  $\delta^{13}C$  value among the identified organic species was tPh  
throughout the entire period, whose  $\delta^{13}C$  value ( $-35.4 \pm 3.1\%$ ) was approximately equal to that ( $-35.2 \pm 5.3\%$ ) in  
Liaocheng (Meng et al., 2020) and lighter than that ( $-33.5 \pm 3.4\%$ ) in Beijing (Zhao et al., 2018) of China where the  
primary emissions from the combustion of plastic wastes is an essential source of tPh. Moreover, the  $\delta^{13}C$  value of tPh was  
negatively correlated with the ratio of tPh/diacids before and during the LCD, respectively. These results suggest that the  
385 primary sources of plastic wastes burning exerted a significant impact on tPh in the atmosphere of Jinan.

Similarly, the  $\delta^{13}C$  value of oxoacids increases as carbon number decreases (Table 3, Fig. 6).  $\omega C_2$  has the highest  $\delta^{13}C$  value,  
followed by Pyr, and  $\omega C_3$  before and during the LCD. The more pronounced enhancement of  $\delta^{13}C$  values in  $C_2$  and  $\omega C_2$  in  
each period suggests that  $C_2$  in Jinan aerosols was mainly originated from aqueous oxidation of  $\omega C_2$  (Meng et al., 2020).  
However, the lighter isotope ( $^{12}C$ ) was more enriched in  $\omega C_2$  than both Gly and mGly (Table 3) in each period.  $\omega C_2$  is  
390 largely derived from the photochemical oxidation of organic precursors such as  $\alpha$ -dicarbonyls and acetic acid (Carlton et al.,  
2007).  $^{12}C$  can be preferentially accumulated in the products in the non-reversible chemical processes (Wang et al., 2012),  
resulting in the lighter  $\delta^{13}C$  values of  $\omega C_2$  than its precursors. mGly was less enriched in  $^{13}C$  than Gly (Table 3, Fig. 6) in  
each period, which was attributed to the lower vapor pressure and higher carbon numbers of mGly that may lead to the  
weaker isotopic fractionation (Zhang et al., 2016).

### 395 3.5.2 Difference in $\delta^{13}C$ values before and during the LCD

It is well established that the  $^{13}C$  values of diacids and related compounds become isotopically heavier in the aging process  
of organic aerosols (Pavuluri and Kawamura, 2016; Zhang et al., 2016). As mentioned above, the ratios of  $C_2$ /Gly,  $C_2$ /mGly,  
and  $C_2$ /diacids are usually considered significant proxies to evaluate the aging of organic aerosols. These ratios exhibited  
strong correlations with the  $^{13}C$  values of  $C_2$  in each period ( $R^2 > 0.4$ , Fig. 8), indicating the production of more  $^{13}C$ -enriched  
400  $C_2$  during the aging processes. The less depletion of  $^{13}C$  in  $C_2$  of aged organic aerosols conformed to the actual secondary  
KIE on activated H-atom abstraction by  $\cdot OH$  radicals rather than to the mass dependence of collision frequencies in the gas  
phase (Enami et al., 2015). Organic species can react with  $\cdot OH$  radicals and other atmospheric oxidants in the atmospheric  
oxidation reactions, which result in the removal of  $CO_2/CO$  containing  $^{12}C$  and cause the oxidation products more enriched  
with the heavier isotope  $^{13}C$  (Narukawa et al., 1999). Therefore, the  $^{13}C$  values of major diacids and the related compounds  
405 during the LCD were less negative than those before the LCD, again demonstrating that the photochemical oxidation was



promoted during the LCD because of the higher temperature and the stronger atmospheric oxidation capacity under the more clear sky conditions.

### 3.6 Comparison of the source fingerprinting before and during the LCD

To further investigate the crucial sources of diacids and related compounds, positive matrix factorization (PMF) was adopted. As showed in Fig. 9, five major sources were determined before and during the LCD, respectively. Before the LCD, C<sub>2</sub>, C<sub>3</sub>, ωC<sub>2</sub>, mGly, LWC, WSOC, NO<sub>3</sub><sup>-</sup>, and SO<sub>4</sub><sup>2-</sup> exhibited the relatively higher loadings in the first factor (Fig. 9a). SO<sub>4</sub><sup>2-</sup> is a representative product of secondary oxidation in the aqueous phase, thus the first factor was considered the sources from aqueous phase oxidation. The second factor was characterized by the stronger loadings of C<sub>3</sub>, Ph, and EC. Ph is generated from the photochemical oxidation of polycyclic aromatic hydrocarbons (e.g., naphthalene) that are primarily emitted from the domestic coal combustion in China's megacities (Zhao et al., 2018), thus the second factor was categorized as a coal combustion source. O<sub>3</sub> had been confirmed to be a reliable proxy for photochemical oxidation, thus the robust relationships of O<sub>3</sub> and α-dicarbonyls with the third factor indicated the contribution of photochemical oxidation. The fourth factor was significantly associated with Mg<sup>2+</sup> and Ca<sup>2+</sup>, which represented the dust sources. As an important indicator of biomass burning, levoglucosan was strongly correlated with C<sub>4</sub>, C<sub>9</sub>, α-dicarbonyls, and EC in the fifth factor, suggesting the contribution of biomass burning.

During the LCD, the first factor was dominated by O<sub>3</sub> and major diacids (Fig. 9b), which represented photochemical oxidation dominated by O<sub>3</sub>. The second factor was strongly correlated with C<sub>2</sub>, C<sub>3</sub>, LWC, EC, SO<sub>4</sub><sup>2-</sup>, and NO<sub>3</sub><sup>-</sup>, suggesting a significant contribution of aqueous oxidation. Levoglucosan, C<sub>9</sub>, α-dicarbonyls, and OC presented the stronger loadings in the third factor, indicating the sources from biomass burning. Mg<sup>2+</sup> and Ca<sup>2+</sup> exhibited strong correlations with the fourth factor, suggesting the sources from dust. Ph, α-dicarbonyls, and EC presented the strong correlations with the fifth factor, representing a coal combustion source.

The PMF-resolved relative contributions to the detected species before and during the LCD were presented in Fig. 9c and Fig. 9d, respectively. The aqueous oxidation made the greatest contribution (45.2%) to C<sub>2</sub> and related compounds before the LCD, while it accounted for only 17.7% in the total identified sources during the LCD. The photochemical oxidation dominated by O<sub>3</sub> contributed the largest percentage (48.8%) to the total identified sources, confirming that such a source exerted a leading role in the formation of homologous diacids during the LCD, which was agreement with the results as discussed above. The contribution of biomass burning increased from 10.2% before the LCD to 15.2% during the LCD. However, the contribution of coal combustion decreased from 16.7% before the LCD to 8.7% during the LCD, largely because of the decreased usage of coal for industry during the LCD.

## 4 Summary and conclusions

To explore the impact of LCD on the SOA, PM<sub>2.5</sub> aerosols from Jinan, a megacity in East China, before and during the LCD were analyzed for OC, EC, WSOC, inorganic ions, diacids, oxoacids, and α-dicarbonyls. Due to the sharp dropping of human activities, the air pollutants including PM<sub>2.5</sub>, PM<sub>10</sub>, CO, SO<sub>2</sub>, and NO<sub>2</sub> during the LCD reduced by 39.3–62.4% than those before the LCD. However, the O<sub>3</sub> concentration increased by 1.3 times synchronously during the LCD, which was largely launched by the reduction of anthropogenic emissions whose contribution reached up to 81.8%. The concentrations of diacids and oxoacids during the LCD exhibited upward trends, while α-dicarbonyls during the LCD was almost equal to that before the LCD. C<sub>2</sub> before the LCD was significantly derived from the acid-catalyzed aqueous phase oxidation of organic precursors emitted from biomass burning where RH and LWC played a significant role. However, C<sub>2</sub> during the LCD was dominantly generated from photochemical degradation of longer-chain homologous diacids driven by stronger solar radiation and higher O<sub>3</sub> concentration rather than higher temperature. The δ<sup>13</sup>C values of major detected diacids were

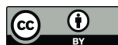

more positive during the LCD than before the LCD, with the largest value ( $-20 \pm 2.5\%$ ) for  $C_2$  and the smallest ( $-35 \pm 3.1\%$ ) for tPh. The ratios of  $C_2/\text{Gly}$ ,  $C_2/\text{mGly}$ , and  $C_2/\text{diacids}$  exhibited strong correlations with  $^{13}\text{C}$  values of  $C_2$ , indicating the more enriched  $^{13}\text{C}$  in  $C_2$  during the aging processes of organic aerosols. The molecular distributions of diacid homologues and PMF results suggest that TDOCs in Jinan were primarily derived from the aqueous mechanisms of organic precursors emitted from coal combustion and biomass burning before the LCD, while these species were principally derived from the  $\text{O}_3$ -dominated photochemical pathways during the LCD.

*Data availability.* The data in this study are available at: <https://doi.org/10.5281/zenodo.7533247> (Meng et al., 2023).

*Author contribution.* PF designed the study. WY, LY, HT, and CM carried out the experiments and performed the data analysis. JM prepared the manuscript with contributions from all co-authors.

*Competing interests.* The authors have the following competing interests: One of the coauthors, Prof. Kimitaka Kawamura is one of the editorial members of this journal.

*Acknowledgments.* This work was supported by the National Natural Science Foundation of China (Grant No. 42177083), the Natural Science Foundation of Shandong Province (Grant No. ZR2020MD113), the Junior Faculty Support Program for Scientific and Technological Innovations in Shandong Provincial Higher Education Institutions (2021KJ085), and the Open Funds of State Key Laboratory of Loess and Quaternary Geology, Institute of Earth Environment, Chinese Academy of Sciences (Grant No. SKLLOG2020).

## References

- Aggarwal, S. G. and Kawamura, K.: Molecular distributions and stable carbon isotopic compositions of dicarboxylic acids and related compounds in aerosols from Sapporo, Japan: Implications for photochemical aging during long-range atmospheric transport, *J. Geophys. Res. Atmos.*, 113, D14301, [10.1029/2007jd009365](https://doi.org/10.1029/2007jd009365), 2008.
- Andreae, M. O.: Soot Carbon and Excess Fine Potassium: Long-Range Transport of Combustion-Derived Aerosols, *Science*, 220, 1148, 1983.
- Bao, R. and Zhang, A.: Does lockdown reduce air pollution? Evidence from 44 cities in northern China, *Sci. Total Environ.*, 731, 139052, <https://doi.org/10.1016/j.scitotenv.2020.139052>, 2020.
- Bikkina, S., Kawamura, K., and Miyazaki, Y.: Latitudinal distributions of atmospheric dicarboxylic acids, oxocarboxylic acids, and  $\alpha$ -dicarbonyls over the western North Pacific: Sources and formation pathways, *J. Geophys. Res. Atmos.*, 120, 5010-5035, [10.1002/2014jd022235](https://doi.org/10.1002/2014jd022235), 2015.
- Bikkina, S., Kawamura, K., Sakamoto, Y., and Hirokawa, J.: Low molecular weight dicarboxylic acids, oxocarboxylic acids and  $\alpha$ -dicarbonyls as ozonolysis products of isoprene: Implication for the gaseous-phase formation of secondary organic aerosols, *Sci. Total Environ.*, 769, 144472, <https://doi.org/10.1016/j.scitotenv.2020.144472>, 2021.
- Bilde, M., Barsanti, K., Booth, M., Cappa, C. D., Donahue, N. M., Emanuelsson, E. U., McFiggans, G., Krieger, U. K., Marcolli, C., Topping, D., Ziemann, P., Barley, M., Clegg, S., Dennis-Smith, B., Hallquist, M., Hallquist, Å. M., Khlystov, A., Kulmala, M., Mogensen, D., Percival, C. J., Pope, F., Reid, J. P., Ribeiro da Silva, M. A. V., Rosenoern, T., Salo, K., Soonsin, V. P., Yli-Juuti, T., Prisle, N. L., Pagels, J., Rarey, J., Zardini, A. A., and Riipinen, I.: Saturation Vapor Pressures and Transition Enthalpies of Low-Volatility Organic Molecules of Atmospheric Relevance: From Dicarboxylic Acids to Complex Mixtures, *Chem. Rev.*, 115, 4115-4156, [10.1021/cr5005502](https://doi.org/10.1021/cr5005502), 2015.
- Cao, F., Zhang, S.-C., Kawamura, K., Liu, X., Yang, C., Xu, Z., Fan, M., Zhang, W., Bao, M., Chang, Y., Song, W., Liu, S., Lee, X., Li, J., Zhang, G., and Zhang, Y.-L.: Chemical characteristics of dicarboxylic acids and related organic



- compounds in PM<sub>2.5</sub> during biomass-burning and non-biomass-burning seasons at a rural site of Northeast China, *Environ. Pollut.*, 231, 654-662, <https://doi.org/10.1016/j.envpol.2017.08.045>, 2017.
- 490 Carlton, A. G., Turpin, B. J., Lim, H.-J., Altieri, K. E., and Seitzinger, S.: Link between isoprene and secondary organic aerosol (SOA): Pyruvic acid oxidation yields low volatility organic acids in clouds, *Geophys. Res. Lett.*, 33, L06822, [10.1029/2005gl025374](https://doi.org/10.1029/2005gl025374), 2006.
- Carlton, A. G., Turpin, B. J., Altieri, K. E., Seitzinger, S., Reff, A., Lim, H.-J., and Ervens, B.: Atmospheric oxalic acid and SOA production from glyoxal: Results of aqueous photooxidation experiments, *Atmos. Environ.*, 41, 7588-7602, <http://dx.doi.org/10.1016/j.atmosenv.2007.05.035>, 2007.
- 495 Cheng, C., Wang, G., Meng, J., Wang, Q., Cao, J., Li, J., and Wang, J.: Size-resolved airborne particulate oxalic and related secondary organic aerosol species in the urban atmosphere of Chengdu, China, *Atmos. Res.*, 161-162, 134-142, <http://dx.doi.org/10.1016/j.atmosres.2015.04.010>, 2015.
- Chow, J. C., Watson, J. G., Chen, L. W. A., Arnott, W. P., Moosmüller, H., and Fung, K.: Equivalence of Elemental Carbon by Thermal/Optical Reflectance and Transmittance with Different Temperature Protocols, *Environ. Sci. Technol.*, 38, 4414-4422, [10.1021/es034936u](https://doi.org/10.1021/es034936u), 2004.
- 500 Deshmukh, D. K., Mozammel Haque, M., Kawamura, K., and Kim, Y.: Dicarboxylic acids, oxocarboxylic acids and  $\alpha$ -dicarbonyls in fine aerosols over central Alaska: Implications for sources and atmospheric processes, *Atmos. Res.*, 202, 128-139, <https://doi.org/10.1016/j.atmosres.2017.11.003>, 2018.
- Ding, Z., Du, W., Wu, C., Cheng, C., Meng, J., Li, D., Ho, K., Zhang, L., and Wang, G.: Summertime atmospheric dicarboxylic acids and related SOA in the background region of Yangtze River Delta, China: Implications for heterogeneous reaction of oxalic acid with sea salts, *Sci. Total Environ.*, 757, 143741, <https://doi.org/10.1016/j.scitotenv.2020.143741>, 2021.
- Enami, S., Hoffmann, M. R., and Colussi, A. J.: Stepwise Oxidation of Aqueous Dicarboxylic Acids by Gas-Phase OH Radicals, *J. Phys., Chem. Lett.*, 6, 527-534, [10.1021/jz502432j](https://doi.org/10.1021/jz502432j), 2015.
- Ervens, B., Feingold, G., Frost, G. J., and Kreidenweis, S. M.: A modeling study of aqueous production of dicarboxylic acids: 1. Chemical pathways and speciated organic mass production, *J. Geophys. Res.*, 109, D15205, [10.1029/2003jd004387](https://doi.org/10.1029/2003jd004387), 2004.
- 510 Ervens, B., Turpin, B. J., and Weber, R. J.: Secondary organic aerosol formation in cloud droplets and aqueous particles (aqSOA): a review of laboratory, field and model studies, *Atmos. Chem. Phys.*, 11, 11069-11102, [10.5194/acp-11-11069-2011](https://doi.org/10.5194/acp-11-11069-2011), 2011.
- 515 Fountoukis, C., and Nenes, A.: ISORROPIA II: a computationally efficient thermodynamic equilibrium model for  $K^+$ - $Ca^{2+}$ - $Mg^{2+}$ - $NH_4^+$ - $Na^+$ - $SO_4^{2-}$ - $NO_3^-$ - $Cl^-$ - $H_2O$  aerosols, *Atmos. Chem. Phys.*, 7, 4639-4659, [10.5194/acp-7-4639-2007](https://doi.org/10.5194/acp-7-4639-2007), 2007.
- Fu, T.-M., Jacob, D. J., Wittrock, F., Burrows, J. P., Vrekoussis, M., and Henze, D. K.: Global budgets of atmospheric glyoxal and methylglyoxal, and implications for formation of secondary organic aerosols, *J. Geophys. Res.*, 113, D15303, [10.1029/2007jd009505](https://doi.org/10.1029/2007jd009505), 2008.
- 520 Gao, S., Hegg, D. A., Hobbs, P. V., Kirchstetter, T. W., Magi, B. I., and Sadilek, M.: Water-soluble organic components in aerosols associated with savanna fires in southern Africa: Identification, evolution, and distribution, *J. Geophys. Res. Atmos.*, 108, 8491, [10.1029/2002jd002324](https://doi.org/10.1029/2002jd002324), 2003.
- Gligorovski, S., Grgić, I., Net, S., Bøge, O., Iinuma, Y., Kahnt, A., Scheinhardt, S., Herrmann, H., and Wortham, H.: Light-induced multiphase chemistry of gas phase ozone on aqueous pyruvic and oxalic acids: Aerosol chamber study, *AGU Fall Meeting Abstracts*, 2010.
- 525 Ho, K. F., Cao, J. J., Lee, S. C., Kawamura, K., Zhang, R. J., Chow, J. C., and Watson, J. G.: Dicarboxylic acids, ketocarboxylic acids, and dicarbonyls in the urban atmosphere of China, *J. Geophys. Res. Atmos.*, 112, D22S27,



- 10.1029/2006jd008011, 2007.
- 530 Hu, W., Hu, M., Hu, W. W., Zheng, J., Chen, C., Wu, Y., and Guo, S.: Seasonal variations in high time-resolved chemical compositions, sources, and evolution of atmospheric submicron aerosols in the megacity Beijing, *Atmos. Chem. Phys.*, 17, 9979-10000, 10.5194/acp-17-9979-2017, 2017.
- Huang, X., Ding, A., Gao, J., Zheng, B., Zhou, D., Qi, X., Tang, R., Wang, J., Ren, C., Nie, W., Chi, X., Xu, Z., Chen, L., Li, Y., Che, F., Pang, N., Wang, H., Tong, D., Qin, W., Cheng, W., Liu, W., Fu, Q., Liu, B., Chai, F., Davis, S. J.,  
535 Zhang, Q., and He, K.: Enhanced secondary pollution offset reduction of primary emissions during COVID-19 lockdown in China, *Natl. Sci. Rev.*, 10.1093/nsr/nwaa137, 2020.
- Jang, M., Czoschke, N. M., Lee, S., and Kamens, R. M.: Heterogeneous Atmospheric Aerosol Production by Acid-Catalyzed Particle-Phase Reactions, *Science*, 298, 814, 2002.
- Kawamura, K. and Bikkina, S.: A review of dicarboxylic acids and related compounds in atmospheric aerosols: Molecular  
540 distributions, sources and transformation, *Atmos. Res.*, 170, 140-160, <http://dx.doi.org/10.1016/j.atmosres.2015.11.018>, 2016.
- Kawamura, K. and Kaplan, I. R.: Motor exhaust emissions as a primary source for dicarboxylic acids in Los Angeles ambient air, *Environ. Sci. Technol.*, 21, 105-110, 10.1021/es00155a014, 1987.
- Kawamura, K. and Usukura, K.: Distributions of low molecular weight dicarboxylic acids in the North Pacific aerosol  
545 samples, *J. Oceano.*, 49, 271-283, 10.1007/bf02269565, 1993.
- Kawamura, K. and Watanabe, T.: Determination of Stable Carbon Isotopic Compositions of Low Molecular Weight Dicarboxylic Acids and Ketocarboxylic Acids in Atmospheric Aerosol and Snow Samples, *Anal. Chem.*, 76, 5762-5768, 10.1021/ac049491m, 2004.
- Le, T., Wang, Y., Liu, L., Yang, J., Yung, Y. L., Li, G., and Seinfeld, J. H.: Unexpected air pollution with marked emission  
550 reductions during the COVID-19 outbreak in China, *Science*, eabb7431, 10.1126/science.abb7431, 2020.
- Li, L., Li, Q., Huang, L., Wang, Q., Zhu, A., Xu, J., Liu, Z., Li, H., Shi, L., Li, R., Azari, M., Wang, Y., Zhang, X., Liu, Z., Zhu, Y., Zhang, K., Xue, S., Ooi, M. C. G., Zhang, D., and Chan, A.: Air quality changes during the COVID-19 lockdown over the Yangtze River Delta Region: An insight into the impact of human activity pattern changes on air pollution variation, *Sci. Total Environ.*, 732, 139282, <https://doi.org/10.1016/j.scitotenv.2020.139282>, 2020.
- 555 Li, Z., Zhou, R., Wang, Y., Wang, G., Chen, M., Li, Y., Wang, Y., Yi, Y., Hou, Z., Guo, Q., and Meng, J.: Characteristics and sources of amine-containing particles in the urban atmosphere of Liaocheng, a seriously polluted city in North China during the COVID-19 outbreak, *Environ. Pollut.*, 289, 117887, <https://doi.org/10.1016/j.envpol.2021.117887>, 2021.
- Lim, Y. B., Tan, Y., and Turpin, B. J.: Chemical insights, explicit chemistry, and yields of secondary organic aerosol from  
560 OH radical oxidation of methylglyoxal and glyoxal in the aqueous phase, *Atmos. Chem. Phys.*, 13, 8651-8667, 10.5194/acp-13-8651-2013, 2013.
- Liu, J., Zhou, S., Zhang, Z., Kawamura, K., Zhao, W., Wang, X., Shao, M., Jiang, F., Liu, J., Sun, X., Hang, J., Zhao, J., Pei, C., Zhang, J., and Fu, P.: Characterization of dicarboxylic acids, oxoacids, and  $\alpha$ -dicarbonyls in PM<sub>2.5</sub> within the urban boundary layer in southern China: Sources and formation pathways, *Environ. Pollut.*, 285, 117185, <https://doi.org/10.1016/j.envpol.2021.117185>, 2021.
- 565 Lv, S., Wang, F., Wu, C., Chen, Y., Liu, S., Zhang, S., Li, D., Du, W., Zhang, F., Wang, H., Huang, C., Fu, Q., Duan, Y., and Wang, G.: Gas-to-Aerosol Phase Partitioning of Atmospheric Water-Soluble Organic Compounds at a Rural Site in China: An Enhancing Effect of NH<sub>3</sub> on SOA Formation, *Environ. Sci. Technol.*, 56, 3915-3924, 10.1021/acs.est.1c06855, 2022.
- 570 Meng, J., Liu, X., Hou, Z., Yi, Y., Yan, L., Li, Z., Cao, J., Li, J., and Wang, G.: Molecular characteristics and stable carbon isotope compositions of dicarboxylic acids and related compounds in the urban atmosphere of the North China





- Plain: Implications for aqueous phase formation of SOA during the haze periods, *Sci. Total Environ.*, 705, 135256, <https://doi.org/10.1016/j.scitotenv.2019.135256>, 2020.
- 575 Meng, J., Li, Z., Zhou, R., Chen, M., Li, Y., Yi, Y., Ding, Z., Li, H., Yan, L., Hou, Z., and Wang, G.: Enhanced photochemical formation of secondary organic aerosols during the COVID-19 lockdown in Northern China, *Sci. Total Environ.*, 758, 143709, <https://doi.org/10.1016/j.scitotenv.2020.143709>, 2021.
- Meng, J., Wang, G., Hou, Z., Liu, X., Wei, B., Wu, C., Cao, C., Wang, J., Li, J., Cao, J., Zhang, E., Dong, J., Liu, J., Ge, S., and Xie, Y.: Molecular distribution and stable carbon isotopic compositions of dicarboxylic acids and related SOA from biogenic sources in the summertime atmosphere of Mt. Tai in the North China Plain, *Atmos. Chem. Phys.*, 18, 15069-15086, 10.5194/acp-18-15069-2018, 2018.
- 580 Miyazaki, Y., Aggarwal, S. G., Singh, K., Gupta, P. K., and Kawamura, K.: Dicarboxylic acids and water-soluble organic carbon in aerosols in New Delhi, India, in winter: Characteristics and formation processes, *J. Geophys. Res. Atmos.*, 114, D19206, [10.1029/2009jd011790](https://doi.org/10.1029/2009jd011790), 2009.
- Mochizuki, T., Kawamura, K., Miyazaki, Y., Wada, R., Takahashi, Y., Saigusa, N., and Tani, A.: Secondary formation of oxalic acid and related organic species from biogenic sources in a larch forest at the northern slope of Mt. Fuji, *Atmos. Environ.*, 166, 255-262, <https://doi.org/10.1016/j.atmosenv.2017.07.028>, 2017.
- Narukawa, M., Kawamura, K., Takeuchi, N., and Nakajima, T.: Distribution of dicarboxylic acids and carbon isotopic compositions in aerosols from 1997 Indonesian forest fires, *Geophys. Res. Lett.*, 26, 3101-3104, <https://doi.org/10.1029/1999GL010810>, 1999.
- 590 Pavuluri, C. M. and Kawamura, K.: Enrichment of  $^{13}\text{C}$  in diacids and related compounds during photochemical processing of aqueous aerosols: New proxy for organic aerosols aging, *Sci. Rep.*, 6, 36467, [10.1038/srep36467](https://doi.org/10.1038/srep36467), 2016.
- Rinaldi, M., Decesari, S., Carbone, C., Finessi, E., Fuzzi, S., Ceburnis, D., O'Dowd, C. D., Sciare, J., Burrows, J. P., Vrekoussis, M., Ervens, B., Tsigaridis, K., and Facchini, M. C.: Evidence of a natural marine source of oxalic acid and a possible link to glyoxal, *J. Geophys. Res. Atmos.*, 116, n/a-n/a, [10.1029/2011jd015659](https://doi.org/10.1029/2011jd015659), 2011.
- 595 Shen, M., Ho, K. F., Dai, W., Liu, S., Zhang, T., Wang, Q., Meng, J., Chow, J. C., Watson, J. G., Cao, J., and Li, J.: Distribution and stable carbon isotopic composition of dicarboxylic acids, ketocarboxylic acids and  $\alpha$ -dicarbonyls in fresh and aged biomass burning aerosols, *Atmos. Chem. Phys.*, 22, 7489-7504, 10.5194/acp-22-7489-2022, 2022.
- Shi, Z., Song, C., Liu, B., Lu, G., Xu, J., Van Vu, T., Elliott Robert, J. R., Li, W., Bloss William, J., and Harrison Roy, M.: Abrupt but smaller than expected changes in surface air quality attributable to COVID-19 lockdowns, *Sci. Adv.*, 7, eabd6696, [10.1126/sciadv.abd6696](https://doi.org/10.1126/sciadv.abd6696), 2021.
- 600 Sorathia, F., Rajput, P., and Gupta, T.: Dicarboxylic acids and levoglucosan in aerosols from Indo-Gangetic Plain: Inferences from day night variability during wintertime, *Sci. Total Environ.*, 624, 451-460, <https://doi.org/10.1016/j.scitotenv.2017.12.124>, 2018.
- 605 Surratt, J. D., Lewandowski, M., Offenberg, J. H., Jaoui, M., Kleindienst, T. E., Edney, E. O., and Seinfeld, J. H.: Effect of Acidity on Secondary Organic Aerosol Formation from Isoprene, *Environ. Sci. Technol.*, 41, 5363-5369, [10.1021/es0704176](https://doi.org/10.1021/es0704176), 2007.
- Wang, G., Cheng, C., Meng, J., Huang, Y., Li, J., and Ren, Y.: Field observation on secondary organic aerosols during Asian dust storm periods: Formation mechanism of oxalic acid and related compounds on dust surface, *Atmos. Environ.*, 113, 169-176, <http://dx.doi.org/10.1016/j.atmosenv.2015.05.013>, 2015.
- 610 Wang, G., Xie, M., Hu, S., Gao, S., Tachibana, E., and Kawamura, K.: Dicarboxylic acids, metals and isotopic compositions of C and N in atmospheric aerosols from inland China: implications for dust and coal burning emission and secondary aerosol formation, *Atmos. Chem. Phys.*, 10, 6087-6096, 10.5194/acp-10-6087-2010, 2010.
- Wang, G., Kawamura, K., Cheng, C., Li, J., Cao, J., Zhang, R., Zhang, T., Liu, S., and Zhao, Z.: Molecular Distribution and



- 615 Stable Carbon Isotopic Composition of Dicarboxylic Acids, Ketocarboxylic Acids, and  $\alpha$ -Dicarbonyls in  
Size-Resolved Atmospheric Particles From Xi 'an City, China, *Environ. Sci. Technol.*, 46, 4783-4791,  
10.1021/es204322c, 2012.
- Wang, G., Zhang, R., Gomez, M. E., Yang, L., Levy Zamora, M., Hu, M., Lin, Y., Peng, J., Guo, S., Meng, J., Li, J., Cheng,  
C., Hu, T., Ren, Y., Wang, Y., Gao, J., Cao, J., An, Z., Zhou, W., Li, G., Wang, J., Tian, P., Marrero-Ortiz, W.,  
620 Secret, J., Du, Z., Zheng, J., Shang, D., Zeng, L., Shao, M., Wang, W., Huang, Y., Wang, Y., Zhu, Y., Li, Y., Hu, J.,  
Pan, B., Cai, L., Cheng, Y., Ji, Y., Zhang, F., Rosenfeld, D., Liss, P. S., Duce, R. A., Kolb, C. E., and Molina, M. J.:  
Persistent sulfate formation from London Fog to Chinese haze, *P. Natl. Acad. Sci. USA*, 113, 13630-13635,  
10.1073/pnas.1616540113, 2016.
- Wang, H. and Kawamura, K.: Stable carbon isotopic composition of low-molecular-weight dicarboxylic acids and ketoacids  
625 in remote marine aerosols, *J. Geophys. Res. Atmos.*, 111, <https://doi.org/10.1029/2005JD006466>, 2006.
- Wang, H., Huang, C., Tao, W., Gao, Y., Wang, S., Jing, S., Wang, W., Yan, R., Wang, Q., An, J., Tian, J., Hu, Q., Lou, S.,  
Pöschl, U., Cheng, Y., and Su, H.: Seasonality and reduced nitric oxide titration dominated ozone increase during  
COVID-19 lockdown in eastern China, *npj Climate and Atmospheric Science*, 5, 24, 10.1038/s41612-022-00249-3,  
2022.
- 630 Wang, J., Wang, G., Wu, C., Li, J., Cao, C., Li, J., Xie, Y., Ge, S., Chen, J., Zeng, L., Zhu, T., Zhang, R., and Kawamura, K.:  
Enhanced aqueous-phase formation of secondary organic aerosols due to the regional biomass burning over North  
China Plain, *Environ. Pollut.*, 256, 113401, <https://doi.org/10.1016/j.envpol.2019.113401>, 2020a.
- Wang, P., Chen, K., Zhu, S., Wang, P., and Zhang, H.: Severe air pollution events not avoided by reduced anthropogenic  
activities during COVID-19 outbreak, *Resour. Conserv. Recy.*, 158, 104814,  
635 <https://doi.org/10.1016/j.resconrec.2020.104814>, 2020b.
- Warneck, P.: In-cloud chemistry opens pathway to the formation of oxalic acid in the marine atmosphere, *Atmos. Environ.*,  
37, 2423-2427, [http://dx.doi.org/10.1016/S1352-2310\(03\)00136-5](http://dx.doi.org/10.1016/S1352-2310(03)00136-5), 2003.
- Wu, J., Bei, N., Hu, B., Liu, S., Wang, Y., Shen, Z., Li, X., Liu, L., Wang, R., Liu, Z., Cao, J., Tie, X., Molina, L. T., and Li,  
G.: Aerosol-photolysis interaction reduces particulate matter during wintertime haze events, *P. Natl. Acad. Sci.*  
640 *USA*, 117, 9755-9761, 10.1073/pnas.1916775117, 2020.
- Xu, B., Zhang, G., Gustafsson, Ö., Kawamura, K., Li, J., Andersson, A., Bikkina, S., Kunwar, B., Pokhrel, A., Zhong, G.,  
Zhao, S., Li, J., Huang, C., Cheng, Z., Zhu, S., Peng, P., and Sheng, G.: Large contribution of fossil-derived  
components to aqueous secondary organic aerosols in China, *Nat. Commun.*, 13, 5115,  
10.1038/s41467-022-32863-3, 2022.
- 645 Yu, Q., Chen, J., Cheng, S., Qin, W., Zhang, Y., Sun, Y., and Ahmad, M.: Seasonal variation of dicarboxylic acids in PM<sub>2.5</sub>  
in Beijing: Implications for the formation and aging processes of secondary organic aerosols, *Sci. Total Environ.*,  
763, 142964, <https://doi.org/10.1016/j.scitotenv.2020.142964>, 2021.
- Yu, Q., Chen, J., Qin, W., Cheng, S., Zhang, Y., Ahmad, M., and Ouyang, W.: Characteristics and secondary formation of  
water-soluble organic acids in PM<sub>1</sub>, PM<sub>2.5</sub> and PM<sub>10</sub> in Beijing during haze episodes, *Sci. Total Environ.*, 669,  
650 175-184, <https://doi.org/10.1016/j.scitotenv.2019.03.131>, 2019.
- Zhang, Y.-L., Kawamura, K., Cao, F., and Lee, M.: Stable carbon isotopic compositions of low-molecular-weight  
dicarboxylic acids, oxocarboxylic acids,  $\alpha$ -dicarbonyls, and fatty acids: Implications for atmospheric processing  
of organic aerosols, *J. Geophys. Res. Atmos.*, 121, 3707-3717, 10.1002/2015jd024081, 2016.
- Zhao, W., Kawamura, K., Yue, S., Wei, L., Ren, H., Yan, Y., Kang, M., Li, L., Ren, L., Lai, S., Li, J., Sun, Y., Wang, Z., and  
655 Fu, P.: Molecular distribution and compound-specific stable carbon isotopic composition of dicarboxylic acids,  
oxocarboxylic acids and  $\alpha$ -dicarbonyls in PM<sub>2.5</sub> from Beijing, China, *Atmos. Chem. Phys.*, 18, 2749-2767,



10.5194/acp-18-2749-2018, 2018.

660 Zhao, W., Ren, H., Kawamura, K., Du, H., Chen, X., Yue, S., Xie, Q., Wei, L., Li, P., Zeng, X., Kong, S., Sun, Y., Wang, Z.,  
and Fu, P.: Vertical distribution of particle-phase dicarboxylic acids, oxoacids and  $\alpha$ -dicarbonyls in the urban  
boundary layer based on the 325 m tower in Beijing, Atmos. Chem. Phys., 20, 10331-10350,  
10.5194/acp-20-10331-2020, 2020.

Zhong, H., Huang, R., Chang, Y., Duan, J., Lin, C., and Chen, Y.: Enhanced formation of secondary organic aerosol from  
photochemical oxidation during the COVID-19 lockdown in a background site in Northwest China, Sci. Total  
665 Environ., 778, 144947, <https://doi.org/10.1016/j.scitotenv.2021.144947>, 2021.



**Table 1. Meteorological parameters, liquid water content (LWC), in-situ pH (pH<sub>is</sub>), and chemical compositions of PM<sub>2.5</sub> before (January 6 – 23, 2020) and during the lockdown (LCD) (January 31 – February 17, 2020) in Jinan, China.**

|                                                     | Before the LCD (n=36)   | During the LCD (n=36)    | Whole period (n=72)     |
|-----------------------------------------------------|-------------------------|--------------------------|-------------------------|
| <b>I. Meteorological parameters</b>                 |                         |                          |                         |
| Temperature (°C)                                    | 0.07 ± 5.9 (-16.5–12.6) | 6.8 ± 5.2 (-3.4–16.1)    | 3.4 ± 6.5 (-16–16)      |
| Relative humidity (%)                               | 52.2 ± 10.2 (29.8–86.9) | 38.8 ± 17.8 (16.8– 85.3) | 45.5 ± 15.9 (16.8–86.9) |
| Solar radiation (W m <sup>-2</sup> )                | 164 ± 69.9 (31.5–282)   | 255 ± 117 (17.5–423)     | 209 ± 106 (17.5–423)    |
| Wind speed (m s <sup>-1</sup> )                     | 3.0 ± 0.7 (1.6–4.6)     | 3.7 ± 1.1 (1.2–6.6)      | 3.3 ± 1.0 (1.2–6.6)     |
| <b>II. Gaseous pollutants (µg m<sup>-3</sup>)</b>   |                         |                          |                         |
| SO <sub>2</sub>                                     | 22.7 ± 8.9 (8.3–49.4)   | 13.8 ± 4.9 (4.9–28.8)    | 18.3 ± 8.5 (4.9–49.4)   |
| NO <sub>2</sub>                                     | 55.9 ± 11.6 (37.9–81.2) | 21.1 ± 5.9 (9.3–33.5)    | 38.5 ± 19.8 (9.3–81.2)  |
| CO                                                  | 1.6 ± 0.3 (0.9–2.5)     | 0.9 ± 0.2 (0.5–1.6)      | 1.3 ± 0.5 (0.5–2.5)     |
| O <sub>3</sub>                                      | 28.9 ± 18.2 (5.3–74.4)  | 66.3 ± 21.0 (25.4–109)   | 47.6 ± 27.1 (5.3–109)   |
| <b>III. Inorganic ions (µg m<sup>-3</sup>)</b>      |                         |                          |                         |
| K <sup>+</sup>                                      | 1.0 ± 0.1 (0.9–1.7)     | 1.3 ± 0.6 (0.5–2.9)      | 1.1 ± 0.4 (0.5–2.9)     |
| Na <sup>+</sup>                                     | 0.3 ± 0.1 (0.1–0.6)     | 0.2 ± 0.1 (0.1–0.8)      | 0.2 ± 0.1 (0.1–0.8)     |
| Ca <sup>2+</sup>                                    | 0.4 ± 0.2 (0.1–0.9)     | 0.5 ± 0.2 (0.2–1.1)      | 0.5 ± 0.2 (0.1–1.1)     |
| Mg <sup>2+</sup>                                    | 0.1 ± 0.03 (0–0.1)      | 0.1 ± 0.1 (0.1–0.4)      | 0.1 ± 0.1 (0–0.4)       |
| NH <sub>4</sub> <sup>+</sup>                        | 11.5 ± 5.7 (4.4–26.1)   | 7.7 ± 4.7 (0.4–15.6)     | 9.6 ± 5.5 (0.4–26.1)    |
| NO <sub>3</sub> <sup>-</sup>                        | 19.3 ± 11.0 (5.4–48.6)  | 9.6 ± 4.9 (1.2–18.2)     | 14.4 ± 9.7 (1.2–48.6)   |
| SO <sub>4</sub> <sup>2-</sup>                       | 12.8 ± 6.9 (3.8–30.7)   | 9.4 ± 5.3 (1.1–17.7)     | 11.1 ± 6.4 (1.1–30.7)   |
| SNA <sup>a</sup>                                    | 43.6 ± 23.4 (14.6–105)  | 26.7 ± 14.6 (2.8–49.8)   | 35.1 ± 21.1 (2.8–105)   |
| Subtotal                                            | 48.7 ± 24.3 (17.9–113)  | 34.5 ± 17.5 (6.1–67.0)   | 41.6 ± 22.2 (6.1–113)   |
| <b>IV. Carbonaceous species (µg m<sup>-3</sup>)</b> |                         |                          |                         |
| EC                                                  | 4.3 ± 2.4 (0.9–11.2)    | 1.9 ± 1.0 (0.3–3.8)      | 3.1 ± 2.2 (0.3–11.2)    |
| OC                                                  | 10.3 ± 3.0 (5.2–18.8)   | 6.4 ± 2.6 (2.0–11.2)     | 8.3 ± 3.4 (2.0–18.8)    |
| WSOC                                                | 3.9 ± 1.9 (1.2–10.4)    | 3.2 ± 1.4 (1.0–7.0)      | 3.5 ± 1.7 (1.0–10.4)    |
| OC/EC                                               | 2.9 ± 1.3 (1.5–6.9)     | 4.0 ± 1.5 (2.4–8.4)      | 3.5 ± 1.5 (1.5–8.4)     |
| WSOC/OC                                             | 0.4 ± 0.1 (0.2–0.7)     | 0.5 ± 0.1 (0.3–0.8)      | 0.4 ± 0.1 (0.2–0.8)     |
| <b>V. Other species</b>                             |                         |                          |                         |
| PM <sub>2.5</sub> (µg m <sup>-3</sup> )             | 106 ± 45.2 (35.0–202)   | 55.5 ± 29.4 (10.0–111)   | 80.8 ± 45.6 (10.0–202)  |
| PM <sub>10</sub> (µg m <sup>-3</sup> )              | 147 ± 57.9 (37.9–285)   | 71.6 ± 32.7 (19.0–129)   | 109 ± 60.1 (19.0–285)   |
| Levoglucosan (ng m <sup>-3</sup> )                  | 141 ± 70.2 (49.9–370)   | 102 ± 29.5 (60.7–186)    | 121 ± 57.0 (49.9–370)   |
| pH <sub>is</sub>                                    | 3.9 ± 0.3 (2.3–4.4)     | 3.7 ± 1.0 (2.3–7.7)      | 3.8 ± 0.7 (2.3–7.7)     |
| LWC                                                 | 34.8 ± 32.7 (4.3–172)   | 10.1 ± 10.0 (0.2–45.4)   | 24 ± 30 (0.2–172)       |
| SNA/PM <sub>2.5</sub> (%)                           | 39.9 ± 6.5 (28.7–54.3)  | 46.9 ± 8.2 (27.6–60.3)   | 43.4 ± 8.1 (27.6–60.3)  |
| N/S <sup>b</sup>                                    | 1.5 ± 0.3 (0.9–2.4)     | 1.1 ± 0.2 (0.7–1.5)      | 1.3 ± 0.4 (0.7–2.4)     |

<sup>a</sup>Total concentration of SO<sub>4</sub><sup>2-</sup>, NO<sub>3</sub><sup>-</sup>, and NH<sub>4</sub><sup>+</sup>.

<sup>b</sup>The ratio of NO<sub>3</sub><sup>-</sup>/SO<sub>4</sub><sup>2-</sup>.



**Table 2. Concentrations ( $\text{ng m}^{-3}$ ) of dicarboxylic acids, oxocarboxylic acids, and  $\alpha$ -dicarbonyls in  $\text{PM}_{2.5}$  before and during the LCD in Jinan.**

| Compounds                                   | Before the LCD ( $n = 36$ ) | During the LCD ( $n = 36$ ) | Whole period ( $n = 72$ )  |
|---------------------------------------------|-----------------------------|-----------------------------|----------------------------|
| <b>I. Dicarboxylic acids</b>                |                             |                             |                            |
| Oxalic, $\text{C}_2$                        | 181 $\pm$ 47.5 (110–381)    | 239 $\pm$ 108 (46.0–478)    | 210 $\pm$ 87.8 (46.0–478)  |
| Malonic, $\text{C}_3$                       | 14.5 $\pm$ 4.3 (5.2–26.1)   | 44.9 $\pm$ 14.3 (17.8–78.6) | 29.7 $\pm$ 18.5 (5.2–78.6) |
| Succinic, $\text{C}_4$                      | 53.9 $\pm$ 28.6 (14.9–178)  | 30.0 $\pm$ 12.7 (11.3–66.3) | 42.0 $\pm$ 25.1 (11.3–178) |
| Glutaric, $\text{C}_5$                      | 6.7 $\pm$ 4.5 (0.6–19.5)    | 7.5 $\pm$ 4.0 (0.7–15.2)    | 7.1 $\pm$ 4.2 (0.6–19.5)   |
| Adipic, $\text{C}_6$                        | 9.2 $\pm$ 8.6 (1.7–40.9)    | 6.1 $\pm$ 3.3 (0.9–14)      | 7.6 $\pm$ 6.7 (0.9–40.9)   |
| Pimelic, $\text{C}_7$                       | 2.3 $\pm$ 1.5 (0.2–7.4)     | 1.9 $\pm$ 1.4 (0–5.1)       | 2.1 $\pm$ 1.5 (0–7.4)      |
| Suberic, $\text{C}_8$                       | 7.7 $\pm$ 4.7 (1.9–23.0)    | 3.0 $\pm$ 2.4 (0.1–13.3)    | 5.4 $\pm$ 4.4 (0.1–22.5)   |
| Azelaic, $\text{C}_9$                       | 12.0 $\pm$ 4.0 (5.8–24.4)   | 5.9 $\pm$ 4.8 (0.4–23.1)    | 9.0 $\pm$ 5.3 (0.4–24.4)   |
| Sebacic, $\text{C}_{10}$                    | 3.9 $\pm$ 2.3 (1.3–9.9)     | 2.6 $\pm$ 1.5 (0.2–5.1)     | 3.3 $\pm$ 2.0 (0.2–9.9)    |
| Undecanedioic, $\text{C}_{11}$              | 4.0 $\pm$ 2.9 (0.5–15.3)    | 3.5 $\pm$ 1.9 (0.3–8.6)     | 3.8 $\pm$ 2.4 (0.3–15.3)   |
| Methylmalonic, $\text{iC}_4$                | 3.5 $\pm$ 4.1 (0.2–13.1)    | 4.8 $\pm$ 4.6 (0–16.9)      | 4.1 $\pm$ 4.4 (0–16.9)     |
| Mehtylsuccinic, $\text{iC}_5$               | 4.2 $\pm$ 3.5 (0.4–11.7)    | 3.4 $\pm$ 1.6 (0.4–6.1)     | 3.8 $\pm$ 2.7 (0.4–11.7)   |
| Methylglutaric, $\text{iC}_6$               | 2.2 $\pm$ 1.1 (0.4–5.6)     | 2.4 $\pm$ 1.4 (0–6.6)       | 2.3 $\pm$ 1.3 (0–6.6)      |
| Maleic, M                                   | 6.9 $\pm$ 6.2 (0.8–33.9)    | 5.0 $\pm$ 2.3 (0.6–11.0)    | 5.9 $\pm$ 4.7 (0.6–34)     |
| Fumaric, F                                  | 10.1 $\pm$ 7.6 (2.3–43.7)   | 1.5 $\pm$ 0.9 (0.2–4.8)     | 5.8 $\pm$ 6.9 (0.2–43.7)   |
| Methylmaleic, mM                            | 5.5 $\pm$ 4.3 (1.4–22.4)    | 4.2 $\pm$ 3.3 (0–15.7)      | 4.9 $\pm$ 3.9 (0–22.4)     |
| Phthalic, Ph                                | 11.0 $\pm$ 6.1 (2.9–34.4)   | 8.8 $\pm$ 6.1 (1.2–25.0)    | 9.9 $\pm$ 6.2 (1.2–34.4)   |
| Isophthalic, iPh                            | 3.0 $\pm$ 3.9 (0.2–23.9)    | 1.8 $\pm$ 2.4 (0–9.9)       | 2.4 $\pm$ 3.3 (0–23.9)     |
| Terephthalic, tPh                           | 2.0 $\pm$ 1.4 (0.2–7.5)     | 1.3 $\pm$ 0.8 (0.1–2.6)     | 1.6 $\pm$ 1.2 (0.1–7.5)    |
| Ketomalonic, $\text{kC}_3$                  | 2.1 $\pm$ 1.4 (0.3–6.3)     | 3.0 $\pm$ 1.7 (0.2–7.4)     | 2.6 $\pm$ 1.6 (0.2–7.4)    |
| Ketopimelic, $\text{kC}_7$                  | 5.1 $\pm$ 4.7 (0.8–20.1)    | 5.7 $\pm$ 4.2 (0.2–17.0)    | 5.4 $\pm$ 4.4 (0.2–20.1)   |
| Subtotal                                    | 351 $\pm$ 92.2 (212–672)    | 386 $\pm$ 127 (121–707)     | 369 $\pm$ 112 (121–707)    |
| <b>II. Oxocarboxylic acids</b>              |                             |                             |                            |
| Pyruvic, Pyr                                | 13.2 $\pm$ 4.9 (4.4–25.1)   | 21.3 $\pm$ 8.8 (7.3–42.6)   | 17.3 $\pm$ 8.2 (4.4–42.6)  |
| Glyoxylic, $\omega\text{C}_2$               | 24.1 $\pm$ 9.1 (6.6–43.0)   | 28.8 $\pm$ 8.5 (10.4–43.4)  | 26.0 $\pm$ 9.0 (6.6–43.4)  |
| 3-Oxopropanoic, $\omega\text{C}_3$          | 4.5 $\pm$ 4.6 (0.8–24.9)    | 12.3 $\pm$ 6.5 (0.6–26.6)   | 8.4 $\pm$ 6.9 (0.6–26.6)   |
| 4-Oxobutanoic, $\omega\text{C}_4$           | 7.1 $\pm$ 6.4 (0.8–38.4)    | 3.1 $\pm$ 2.7 (0–12.4)      | 5.1 $\pm$ 5.3 (0–38.4)     |
| 7-Oxoheptanoic, $\omega\text{C}_7$          | 2.3 $\pm$ 2.2 (0.2–8.6)     | 1.9 $\pm$ 2.0 (0–8.6)       | 2.1 $\pm$ 2.1 (0–8.6)      |
| 8-Oxoocetanoic, $\omega\text{C}_8$          | 3.2 $\pm$ 2.8 (0.4–15.7)    | 3.7 $\pm$ 2.1 (0.1–9.3)     | 3.4 $\pm$ 2.4 (0.1–15.7)   |
| 9-Oxononanoic, $\omega\text{C}_9$           | 6.9 $\pm$ 3.0 (1.5–14.7)    | 3.4 $\pm$ 2.9 (0–9.0)       | 5.2 $\pm$ 3.4 (0–14.7)     |
| Subtotal                                    | 61.3 $\pm$ 19.6 (24.6–106)  | 74.6 $\pm$ 17.0 (37.0–104)  | 67.9 $\pm$ 19.4 (25–106)   |
| <b>III. <math>\alpha</math>-Dicarbonyls</b> |                             |                             |                            |
| Glyoxal, Gly                                | 12.6 $\pm$ 6.3 (4.4–31.8)   | 13.0 $\pm$ 5.3 (2.0–28.1)   | 12.8 $\pm$ 5.8 (2.0–31.8)  |
| Methylglyoxal, mGly                         | 12.0 $\pm$ 7.6 (2.6–30.0)   | 11.7 $\pm$ 4.8 (2.4–20.9)   | 11.8 $\pm$ 6.0 (2.4–29.7)  |
| Subtotal                                    | 25.1 $\pm$ 14.0 (7.8–62.0)  | 24.7 $\pm$ 10.0 (4.4–49.0)  | 24.5 $\pm$ 11.5 (4.4–61.5) |
| Total detected species                      | 437 $\pm$ 117 (246–833)     | 486 $\pm$ 144 (179–825)     | 461 $\pm$ 132 (179–833)    |



675 **Table 3. Differences in the stable carbon isotopic compositions ( $\delta^{13}\text{C}$ , ‰) of major detected diacids and related compounds before and during the LCD.**

| Compounds                                   | Before the LCD ( $n = 36$ )  | During the LCD ( $n = 36$ )  | Whole period ( $n = 72$ )    |
|---------------------------------------------|------------------------------|------------------------------|------------------------------|
| <b>I. Dicarboxylic acids</b>                |                              |                              |                              |
| C <sub>2</sub>                              | -21.6 ± 1.9 (-26.3 to -17.0) | -19.0 ± 2.5 (-23.9 to -14.0) | -20.3 ± 2.5 (-26.3 to -14.0) |
| C <sub>3</sub>                              | -25.3 ± 4.2 (-36.0 to -19.0) | -22.3 ± 2.2 (-25.6 to -17.9) | -23.8 ± 3.6 (-36.0 to -17.9) |
| C <sub>4</sub>                              | -27.7 ± 4.6 (-38.8 to -21.6) | -24.6 ± 2.4 (-28.8 to -20.3) | -26.1 ± 4.0 (-38.8 to -20.3) |
| C <sub>6</sub>                              | -29.0 ± 3.4 (-38.3 to -23.1) | -26.6 ± 2.8 (-31.3 to -21.7) | -27.8 ± 3.3 (-38.3 to -21.7) |
| C <sub>9</sub>                              | -27.3 ± 1.2 (-29.8 to -25.2) | -27.1 ± 2.3 (-32.3 to -23.9) | -27.2 ± 1.8 (-32.3 to -23.9) |
| Ph                                          | -38.6 ± 6.4 (-51.1 to -26.6) | -30.2 ± 2.6 (-36.0 to -26.0) | -34.4 ± 6.4 (-51.1 to -26.0) |
| tPh                                         | -36.5 ± 4.1 (-46.3 to -25.8) | -34.3 ± 0.9 (-35.8 to -31.9) | -35.4 ± 3.1 (-46.3 to -25.8) |
| <b>II. Oxocarboxylic acids</b>              |                              |                              |                              |
| Pyr                                         | -28.2 ± 4.0 (-39.0 to -22.3) | -24.0 ± 2.3 (-28.5 to -20.1) | -26.1 ± 3.9 (-39.0 to -20.1) |
| $\omega\text{C}_2$                          | -26.8 ± 3.6 (-38.4 to -22.4) | -22.7 ± 2.2 (-26.3 to -18.6) | -24.8 ± 3.6 (-38.4 to -18.6) |
| $\omega\text{C}_3$                          | -29.4 ± 4.0 (-39.8 to -23.7) | -25.9 ± 2.3 (-29.9 to -22.0) | -27.6 ± 3.7 (-39.8 to -22.0) |
| <b>III. <math>\alpha</math>-Dicarbonyls</b> |                              |                              |                              |
| Gly                                         | -23.2 ± 3.7 (-35.6 to -18.5) | -19.6 ± 2.2 (-23.9 to -15.9) | -21.4 ± 3.5 (-35.6 to -15.9) |
| mGly                                        | -25.3 ± 3.8 (-37.1 to -20.9) | -21.3 ± 2.0 (-24.6 to -17.8) | -23.3 ± 3.6 (-37.1 to -17.8) |



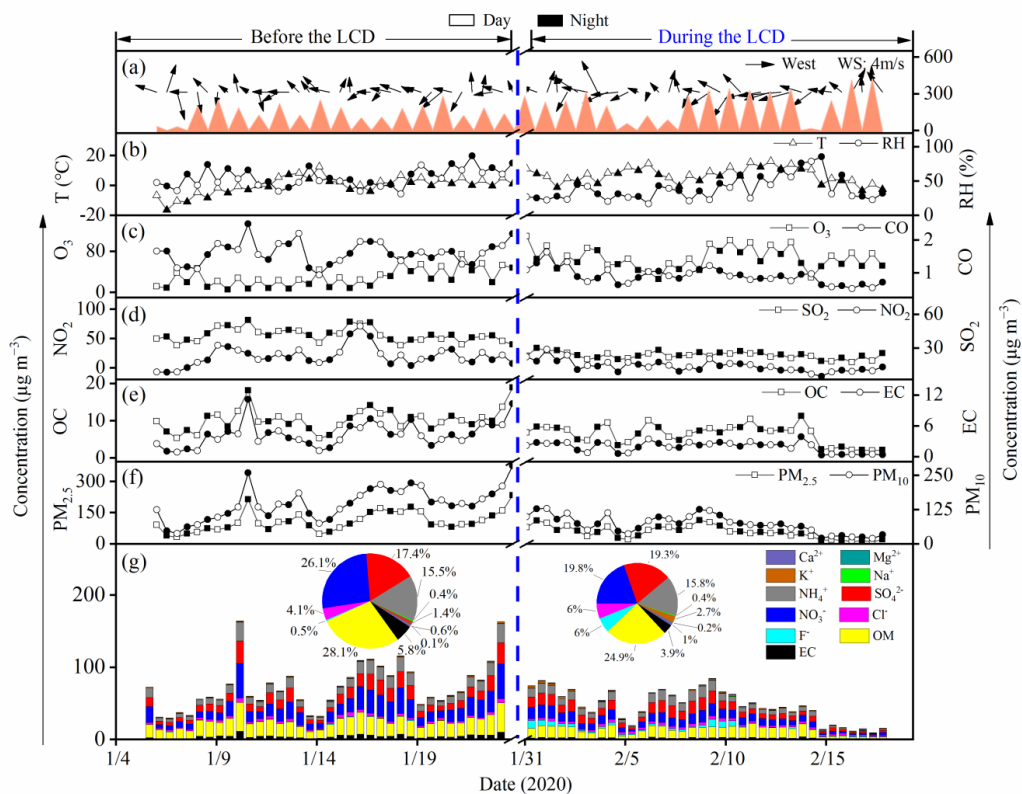

680 **Figure 1. Temporal variations of gaseous pollutants, meteorological parameters, and chemical compositions of PM<sub>2.5</sub> before and during the LCD.**

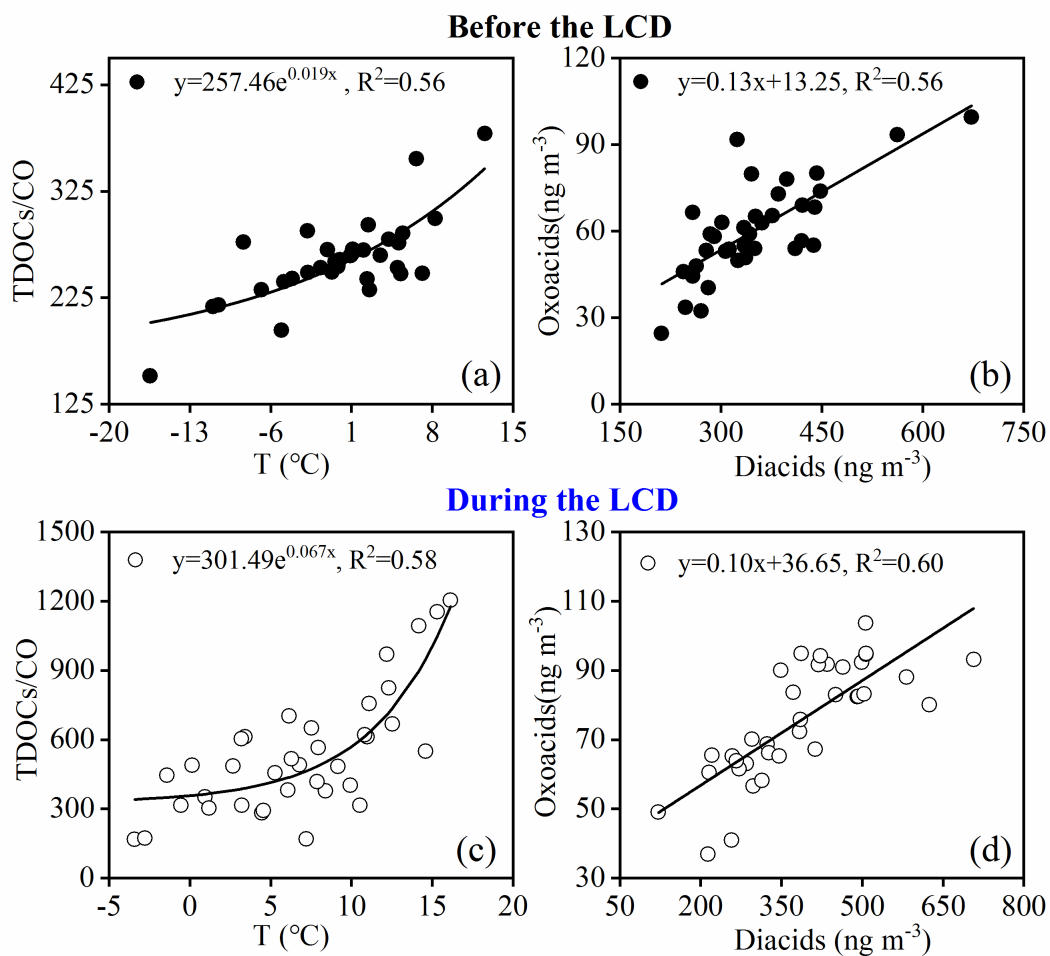

Figure 2. Correlation analysis between concentrations of total detected organic components (TDOCs) and temperature, and between diacids and oxoacids (a) and (b) before the LCD, (c) and (d) during the LCD.

685

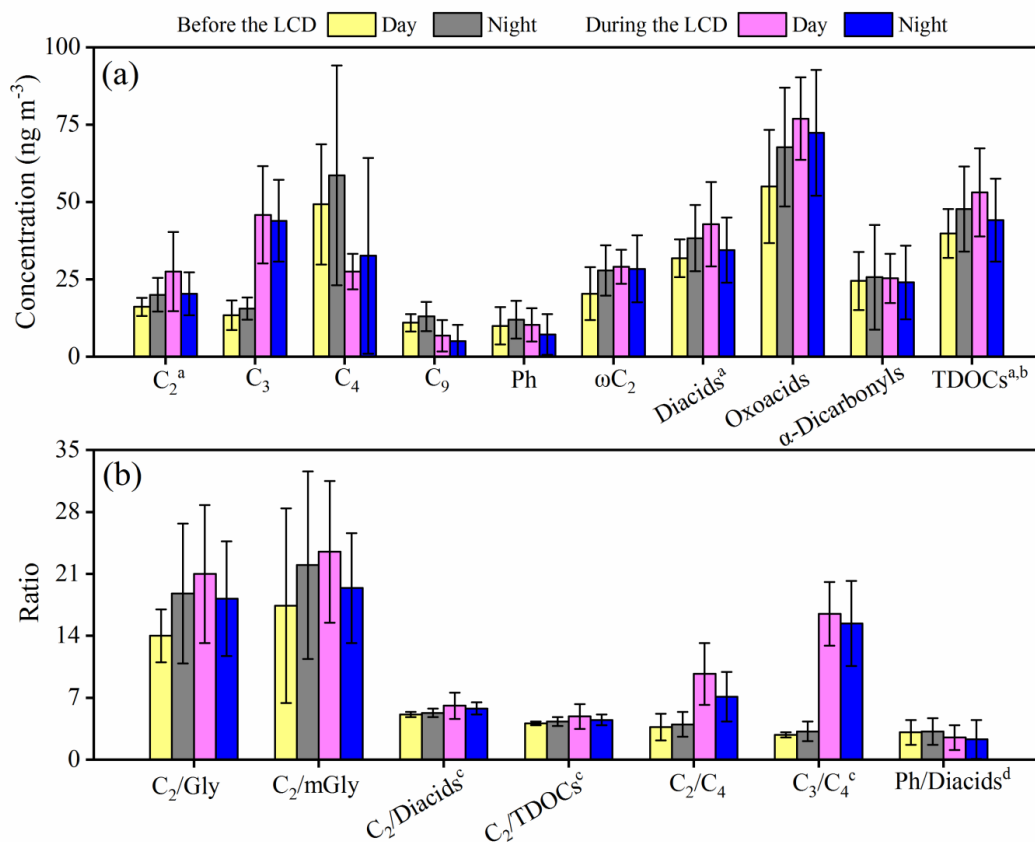

Figure 3. Diurnal changes of (a) major organic compounds and (b) selected mass ratios before and during the LCD (<sup>a</sup>the concentrations reduced by 10 times; <sup>b</sup>TDOCs: total detected organic components; <sup>c</sup>the mass ratios enlarged by 10 times; <sup>d</sup>the mass ratios enlarged by 100 times).

690

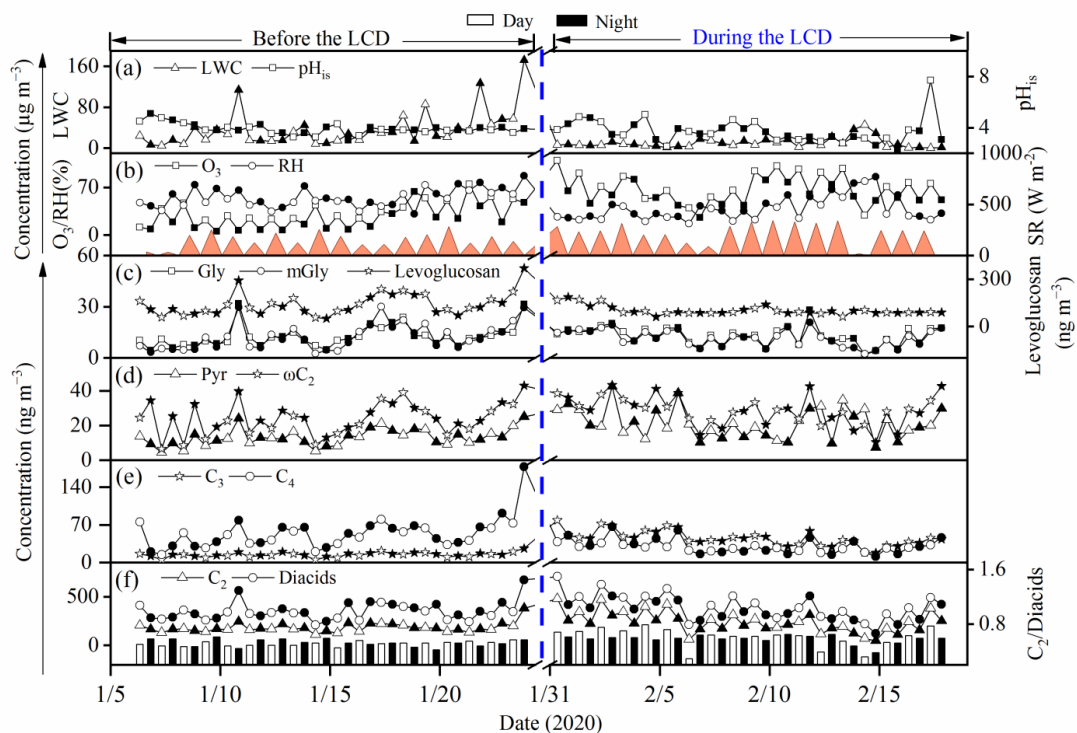

**Figure 4.** Temporal variations in the concentrations of levoglucosan, diacids,  $\text{C}_2$  and its major precursors, the ratios of  $\text{C}_2/\text{Diacids}$ , as well as liquid water content (LWC), in-situ pH ( $\text{pH}_{\text{is}}$ ), temperature, relative humidity (RH), solar radiation, and  $\text{O}_3$  before and during the LCD.

695

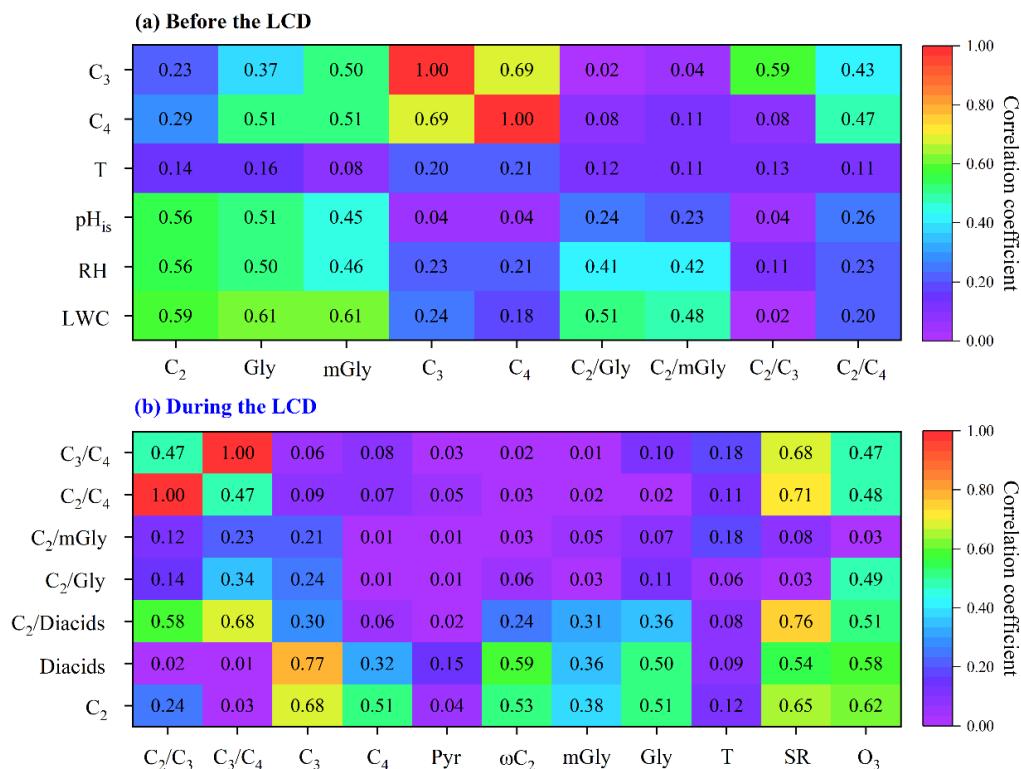

Figure 5. Correlation coefficients ( $R^2$ ) of concentrations of  $C_2$  and its organic precursors and selected ratios with influencing factors (a) before the LCD and (b) during the LCD.

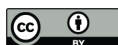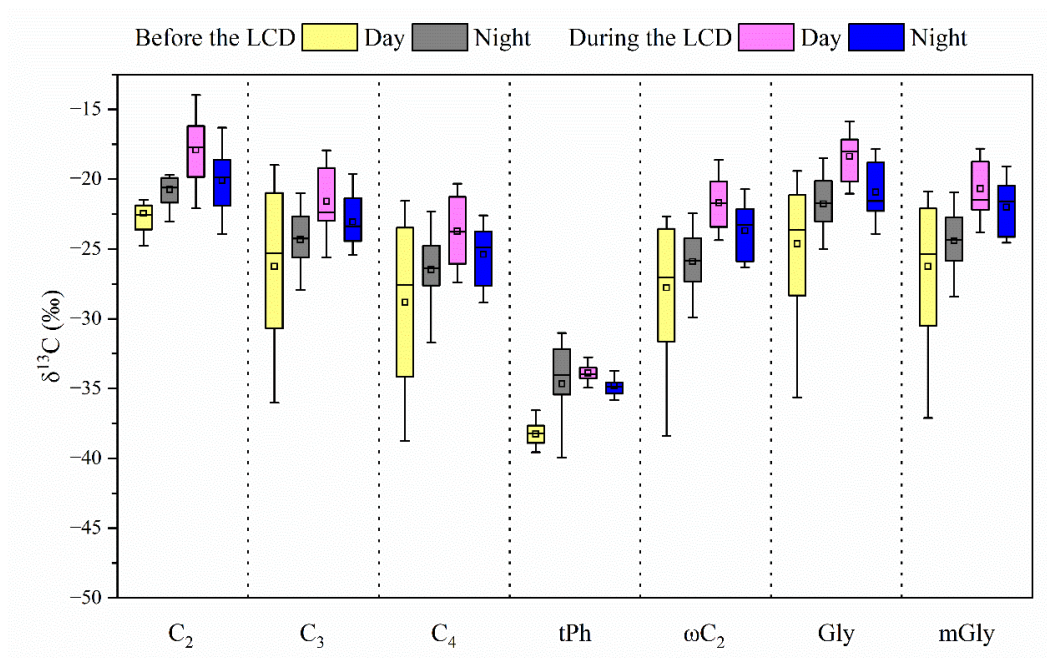

700 **Figure 6.** Differences in the stable carbon isotope compositions of major detected diacids ( $\text{C}_2$ – $\text{C}_4$ , tPh), the smallest oxoacids ( $\omega\text{C}_2$ ), and  $\alpha$ -dicarbonyls including Gly and mGly before and during the LCD in the atmosphere of Jinan.



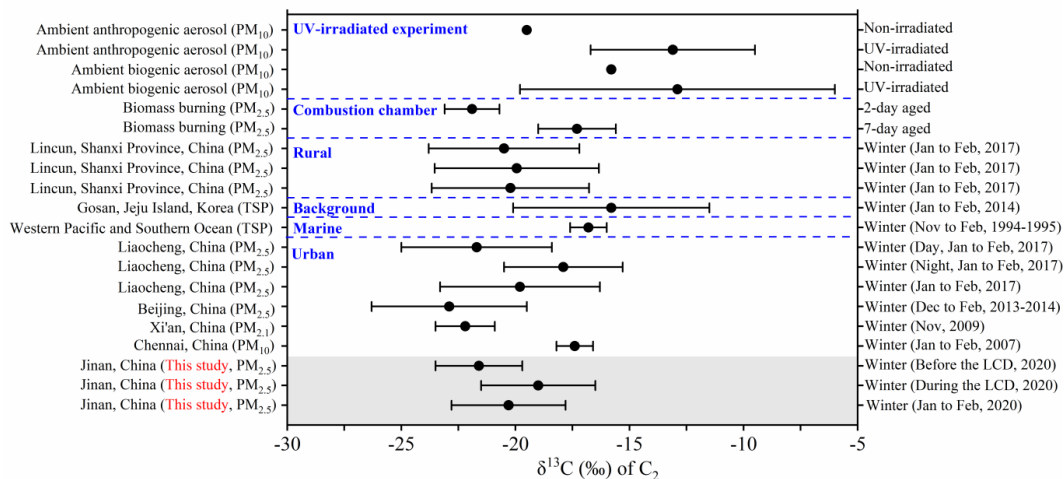

Figure 7. Comparison of stable carbon isotopic compositions ( $\delta^{13}C$ , ‰) of  $C_2$  in aerosols of Jinan with those in other regions in the winter.

705

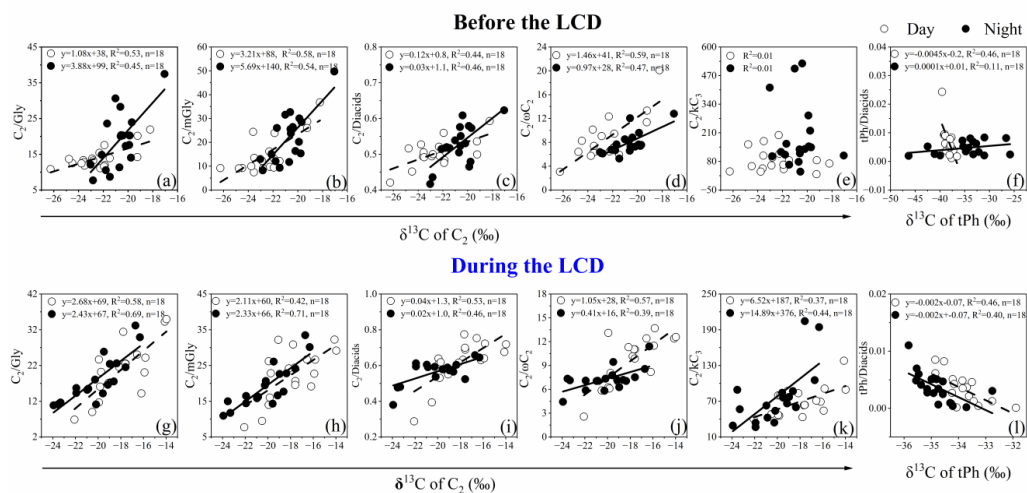

**Figure 8.** Correlations of the  $\delta^{13}C$  of  $C_2$  with the mass ratios of  $C_2/Gly$ ,  $C_2/mGly$ ,  $C_2/Diacids$ ,  $C_2/\omega C_2$ , and  $C_2/kC_3$ , and the  $\delta^{13}C$  of tPh with the mass ratio of tPh/Diacids before and during the LCD in January to February 2020.

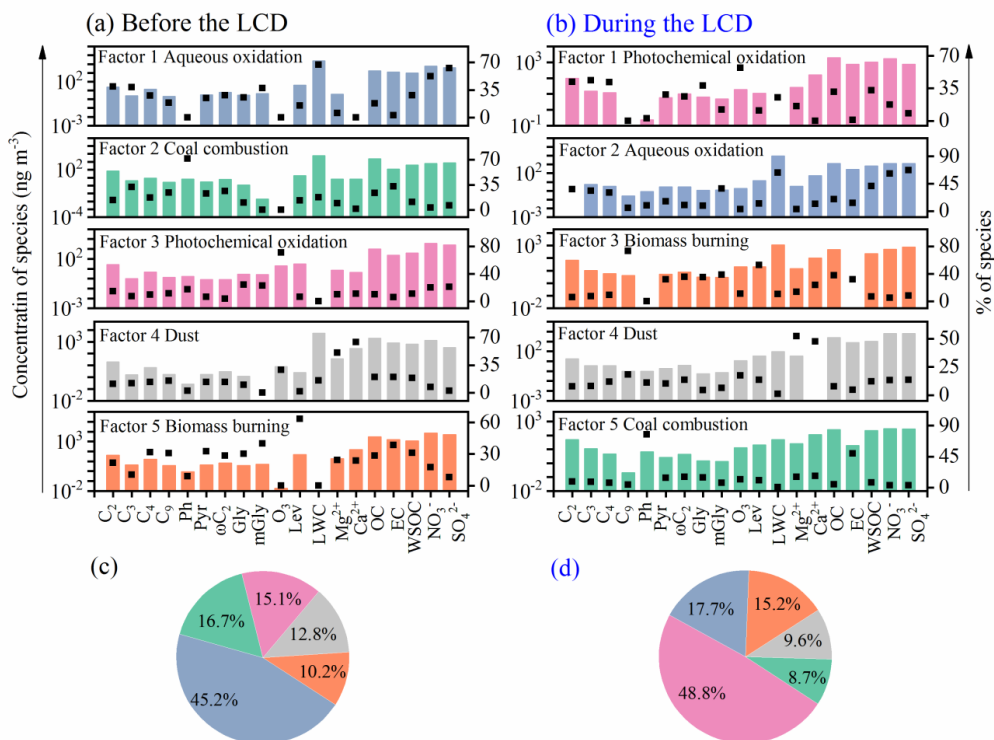

Figure 9. Source profiles of major chemical components in the PM<sub>2.5</sub> samples from Jinan (a, c) before the LCD and (b, d) during the LCD (BB: biomass burning).
